# Supplementary material for: Phaeosphamides A and B, Cytotoxic Cyclodecadepsipeptides from the Mangrove-Derived Fungus Phaeosphaeriopsis sp. S296
Source: Mar Drugs. 2022 Sep 21;20(10):591. doi: 10.3390/md20100591 (PMC9604837; doi:10.3390/md20100591)
Supplement: Supplementary file 1 [file marinedrugs-20-00591-s001.zip › marinedrugs-1892090-supplementary.pdf]

# Supporting Information

## **Phaeosphamides A and B, Cytotoxic Cyclodecadepsipeptides from the Mangrove-Derived Fungus *Phaeosphaeriopsis* sp.**

**S296**

**Siwen Niu <sup>1,†</sup>, Jianlin He <sup>1,†</sup>, Shuhuan Huang <sup>1</sup>, Shouyuan Wu <sup>2</sup>, Ling Zeng <sup>2</sup>, Juan Wang <sup>1</sup>,  
Bihong Hong <sup>1</sup> and Ziming Chen <sup>2,3,\*</sup>**

<sup>1</sup> Technology Innovation Center for Exploitation of Marine Biological Resources, Third Institute of Oceanography, Ministry of Natural Resources, Xiamen 361005, China; niusiwen@tio.org.cn (S.N.); jlhe@tio.org.cn (J.H.); huangsh2268@163.com (S.H.); wangjuan@tio.org.cn (J.W.); bhhong@tio.org.cn (B.H.)

<sup>2</sup> School of Chemistry and Chemical Engineering, Lingnan Normal University, Zhanjiang 524048, China; wushouyuan2012@163.com (S.W.); karine126@126.com (L.Z.)

<sup>3</sup> Mangrove Institute, Lingnan Normal University, Zhanjiang 524048, China

\* Correspondence: chenzm818@163.com; Tel.: +86-075-9318-3245

† The authors contributed equally to this work.

| <b>Contents</b>                                                                                   | <b>Pages</b> |
|---------------------------------------------------------------------------------------------------|--------------|
| <b>Figure S1.</b> HRESIMS spectrum of <b>1</b> .                                                  | S4           |
| <b>Figure S2.</b> $^1\text{H}$ NMR spectrum of <b>1</b> in pyridine- $d_5$ (400 MHz).             | S5           |
| <b>Figure S3.</b> $^{13}\text{C}$ NMR spectrum of <b>1</b> in pyridine- $d_5$ (100 MHz).          | S6           |
| <b>Figure S4.</b> Enlarged $^{13}\text{C}$ NMR spectrum of <b>1</b> in pyridine- $d_5$ (100 MHz). | S7           |
| <b>Figure S5.</b> Enlarged $^{13}\text{C}$ NMR spectrum of <b>1</b> in pyridine- $d_5$ (100 MHz). | S8           |
| <b>Figure S6.</b> Enlarged $^{13}\text{C}$ NMR spectrum of <b>1</b> in pyridine- $d_5$ (100 MHz). | S9           |
| <b>Figure S7.</b> DEPT135 NMR spectrum of <b>1</b> in pyridine- $d_5$ (100 MHz).                  | S10          |
| <b>Figure S8.</b> Enlarged DEPT135 NMR spectrum of <b>1</b> in pyridine- $d_5$ .                  | S11          |
| <b>Figure S9.</b> HSQC spectrum of <b>1</b> in pyridine- $d_5$ .                                  | S12          |
| <b>Figure S10.</b> $^1\text{H}$ - $^1\text{H}$ COSY spectrum of <b>1</b> in pyridine- $d_5$ .     | S13          |
| <b>Figure S11.</b> HMBC spectrum of <b>1</b> in pyridine- $d_5$ .                                 | S14          |
| <b>Figure S12.</b> Enlarged HMBC spectrum of <b>1</b> in pyridine- $d_5$ .                        | S15          |
| <b>Figure S13.</b> Enlarged HMBC spectrum of <b>1</b> in pyridine- $d_5$ .                        | S16          |
| <b>Figure S14.</b> Enlarged HMBC spectrum of <b>1</b> in pyridine- $d_5$ .                        | S17          |
| <b>Figure S15.</b> ROESY spectrum of <b>1</b> in pyridine- $d_5$ .                                | S18          |
| <b>Figure S16.</b> Enlarged ROESY spectrum of <b>1</b> in pyridine- $d_5$ .                       | S19          |
| <b>Figure S17.</b> HRESIMS spectrum of <b>2</b> .                                                 | S20          |
| <b>Figure S18.</b> $^1\text{H}$ NMR spectrum of <b>2</b> in pyridine- $d_5$ (400 MHz).            | S21          |
| <b>Figure S19.</b> $^{13}\text{C}$ NMR spectrum of <b>2</b> in pyridine- $d_5$ (100 MHz).         | S22          |
| <b>Figure S20.</b> Enlarged $^{13}\text{C}$ NMR spectrum of <b>2</b> in pyridine- $d_5$ .         | S23          |
| <b>Figure S21.</b> Enlarged $^{13}\text{C}$ NMR spectrum of <b>2</b> in pyridine- $d_5$ .         | S24          |

|                                                                                                                       |     |
|-----------------------------------------------------------------------------------------------------------------------|-----|
| <b>Figure S22.</b> Enlarged $^{13}\text{C}$ NMR spectrum of <b>2</b> in pyridine- $d_5$ .                             | S25 |
| <b>Figure S23.</b> DEPT135 NMR spectrum of <b>2</b> in pyridine- $d_5$ (100 MHz).                                     | S26 |
| <b>Figure S24.</b> Enlarged DEPT135 NMR spectrum of <b>2</b> in pyridine- $d_5$ .                                     | S27 |
| <b>Figure S25.</b> Enlarged DEPT135 NMR spectrum of <b>2</b> in pyridine- $d_5$ .                                     | S28 |
| <b>Figure S26.</b> HSQC spectrum of <b>2</b> in pyridine- $d_5$ .                                                     | S29 |
| <b>Figure S27.</b> $^1\text{H}$ - $^1\text{H}$ COSY spectrum of <b>2</b> in pyridine- $d_5$ .                         | S30 |
| <b>Figure S28.</b> HMBC spectrum of <b>2</b> in pyridine- $d_5$ .                                                     | S31 |
| <b>Figure S29.</b> Enlarged HMBC spectrum of <b>2</b> in pyridine- $d_5$ .                                            | S32 |
| <b>Figure S30.</b> Enlarged HMBC spectrum of <b>2</b> in pyridine- $d_5$ .                                            | S33 |
| <b>Figure S31.</b> Enlarged HMBC spectrum of <b>2</b> in pyridine- $d_5$ .                                            | S34 |
| <b>Figure S32.</b> ROESY spectrum of <b>2</b> in pyridine- $d_5$ .                                                    | S35 |
| <b>Figure S33.</b> Enlarged ROESY spectrum of <b>2</b> in pyridine- $d_5$ .                                           | S36 |
| <b>Figure S34.</b> Comparison of $^1\text{H}$ NMR spectra of <b>1</b> and <b>3a</b> in pyridine- $d_5$<br>at 600 MHz. | S37 |
| <b>Figure S35.</b> HPLC chromatograms of the Marfey's derivatives of <b>2</b> and<br><b>1</b> .                       | S38 |

S296c #128-322 RT: 0.27-0.67 AV: 49 NL: 2.85E8  
T: FTMS +p ESI Full ms [200.0000-2000.0000]

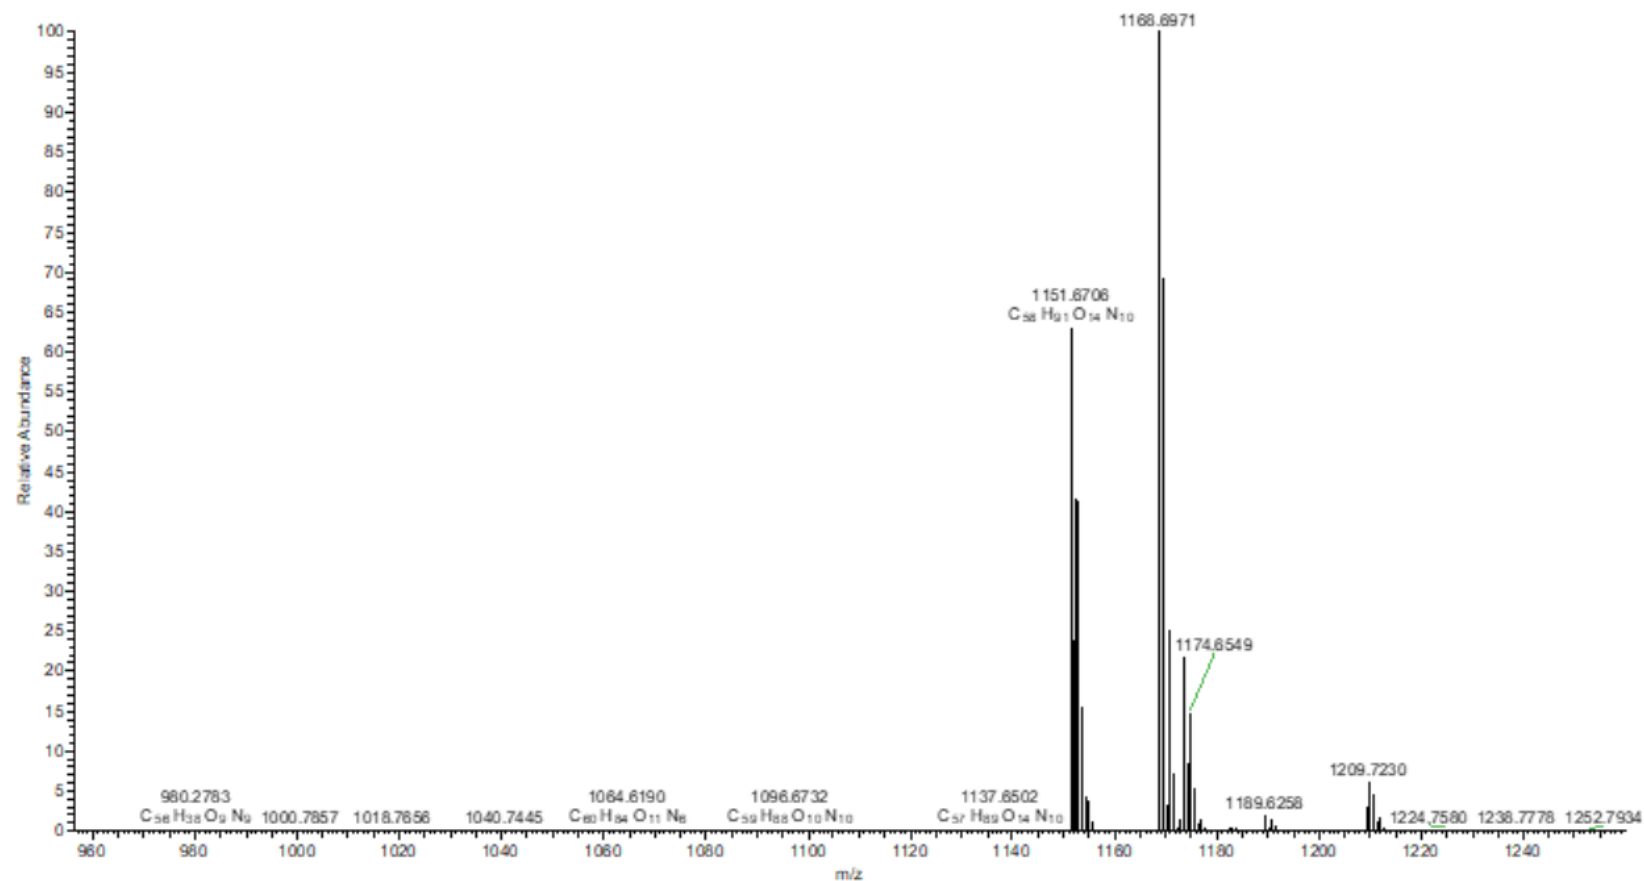

Figure S1. HRESIMS spectrum of 1.

$^1\text{H}$  NMR spectrum of **1** measured in pyridine- $d_5$  at 400 MHz

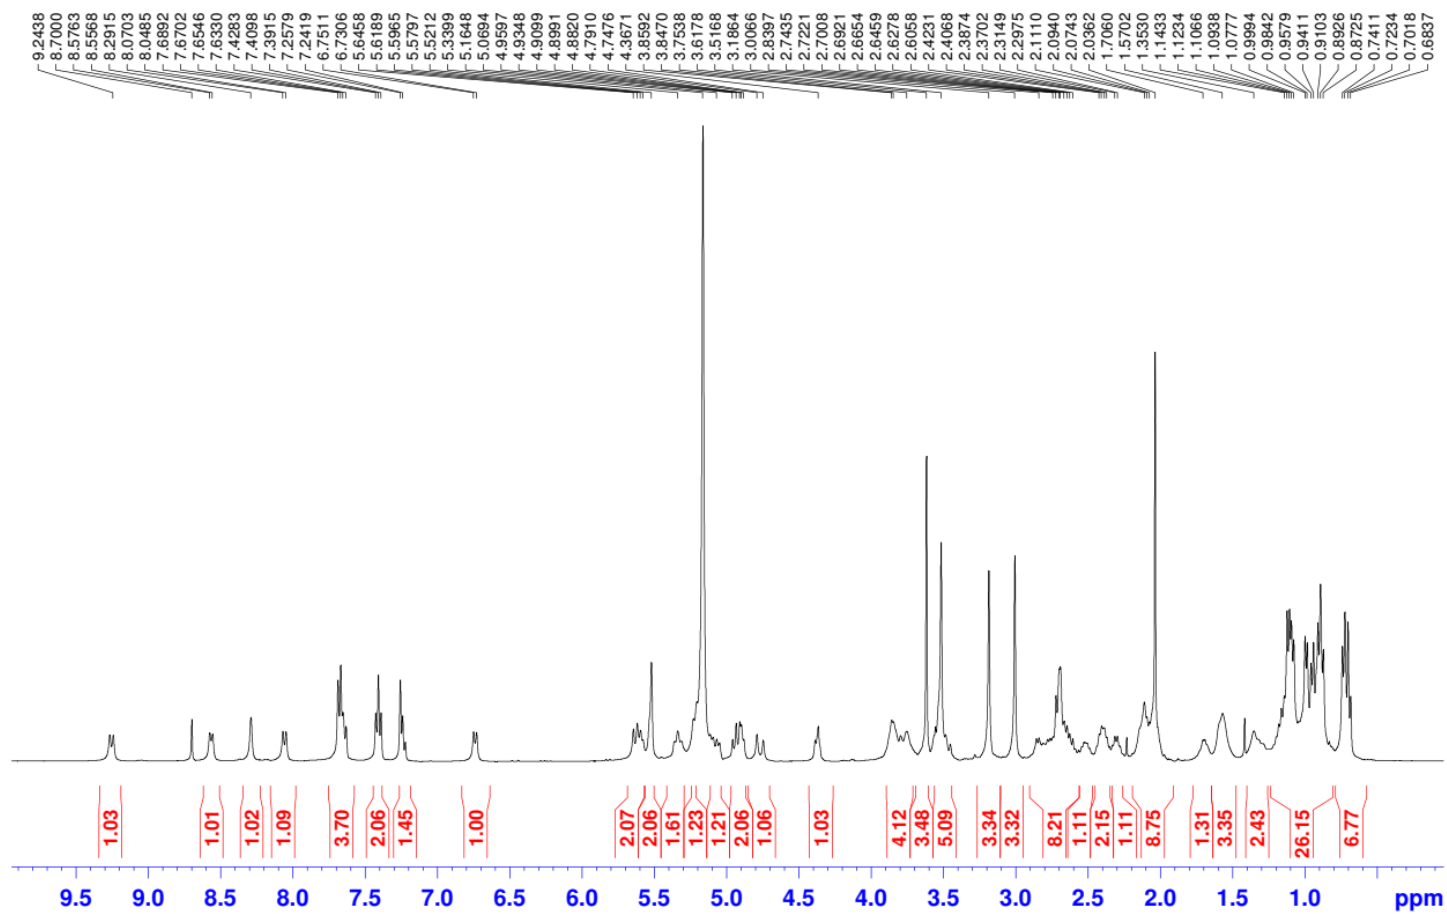

**Figure S2.**  $^1\text{H}$  NMR spectrum of **1** in pyridine- $d_5$  (400 MHz).

$^{13}\text{C}$  NMR spectrum of **1** measured in pyridine- $d_5$  at 100 MHz

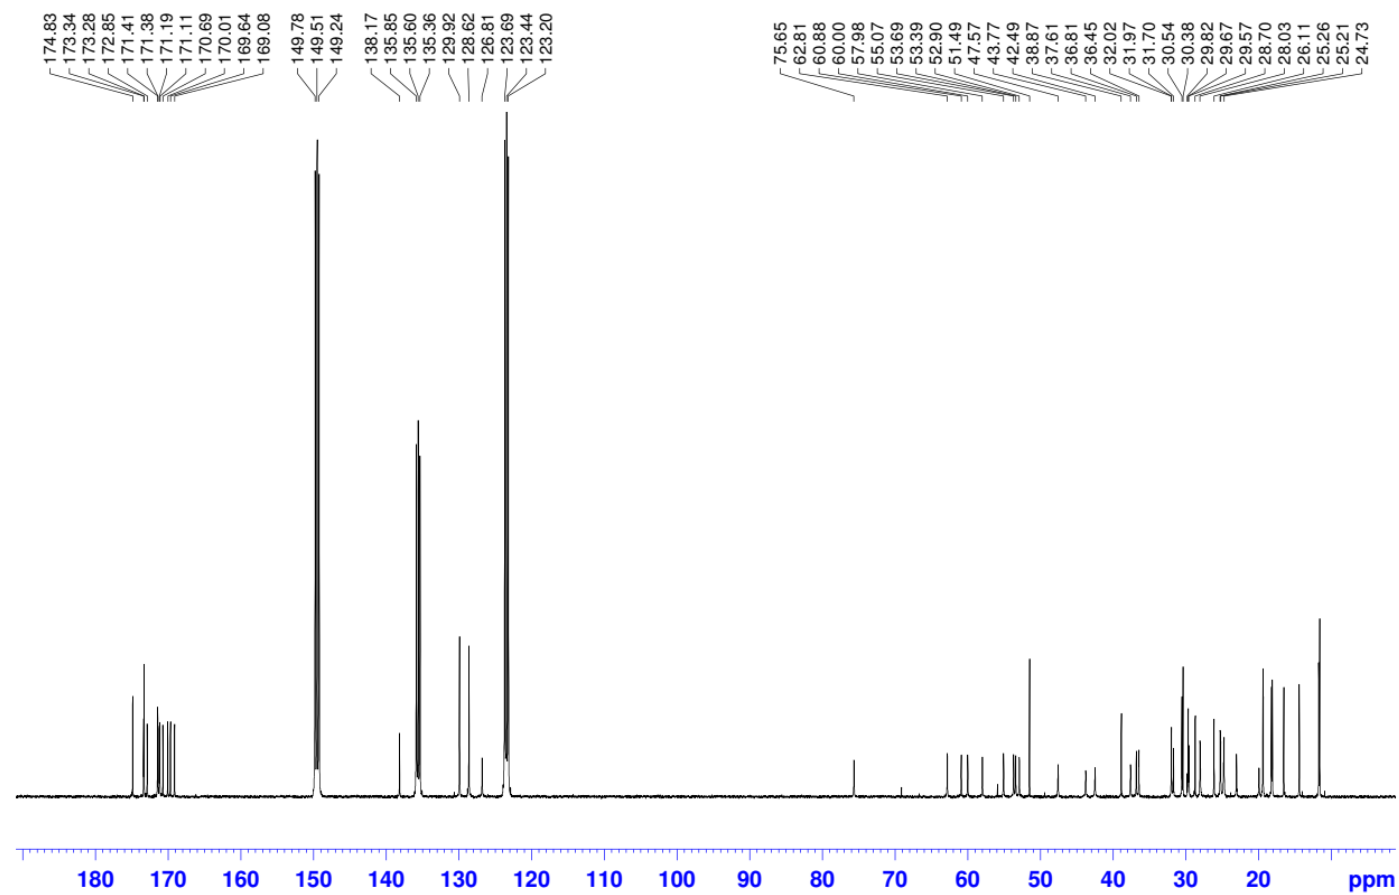

**Figure S3.**  $^{13}\text{C}$  NMR spectrum of **1** in pyridine- $d_5$  (100 MHz).

$^{13}\text{C}$  NMR spectrum of **1** measured in pyridine- $d_5$  at 100 MHz

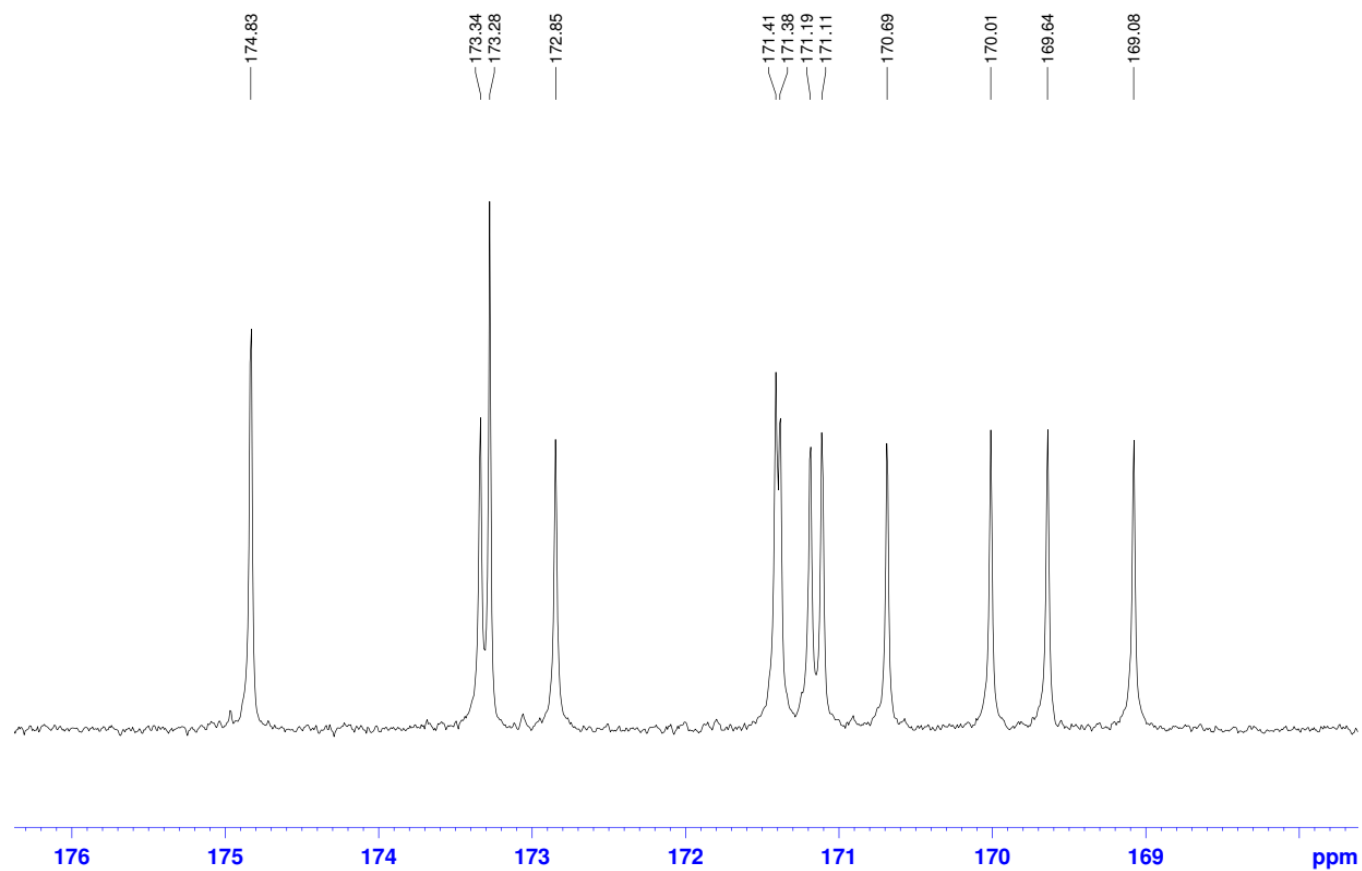

**Figure S4.** Enlarged  $^{13}\text{C}$  NMR spectrum of **1** in pyridine- $d_5$  (100 MHz).

$^{13}\text{C}$  NMR spectrum of **1** measured in pyridine- $d_5$  at 100 MHz

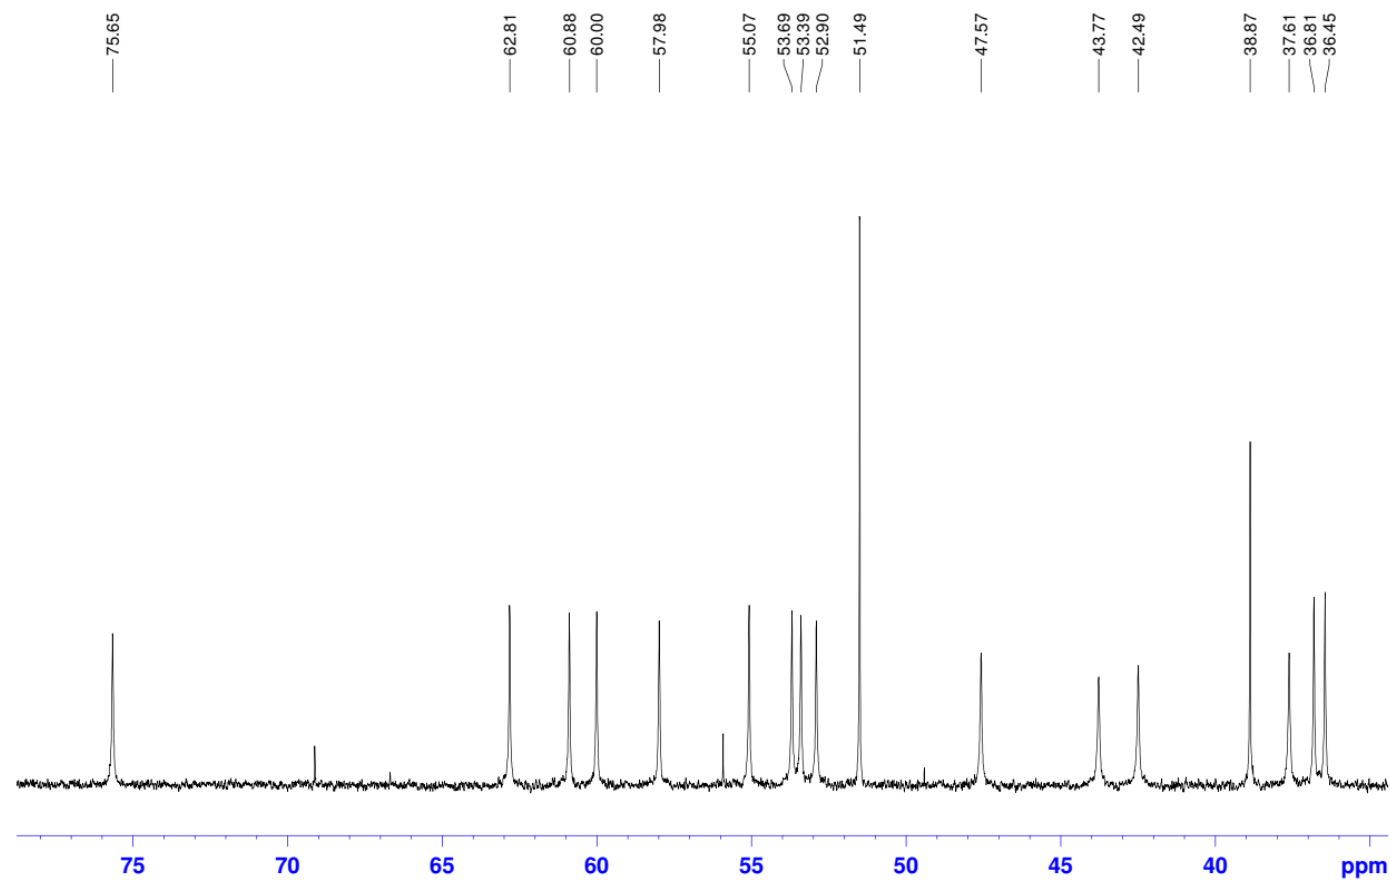

**Figure S5.** Enlarged  $^{13}\text{C}$  NMR spectrum of **1** in pyridine- $d_5$  (100 MHz).

$^{13}\text{C}$  NMR spectrum of **1** measured in pyridine- $d_5$  at 100 MHz

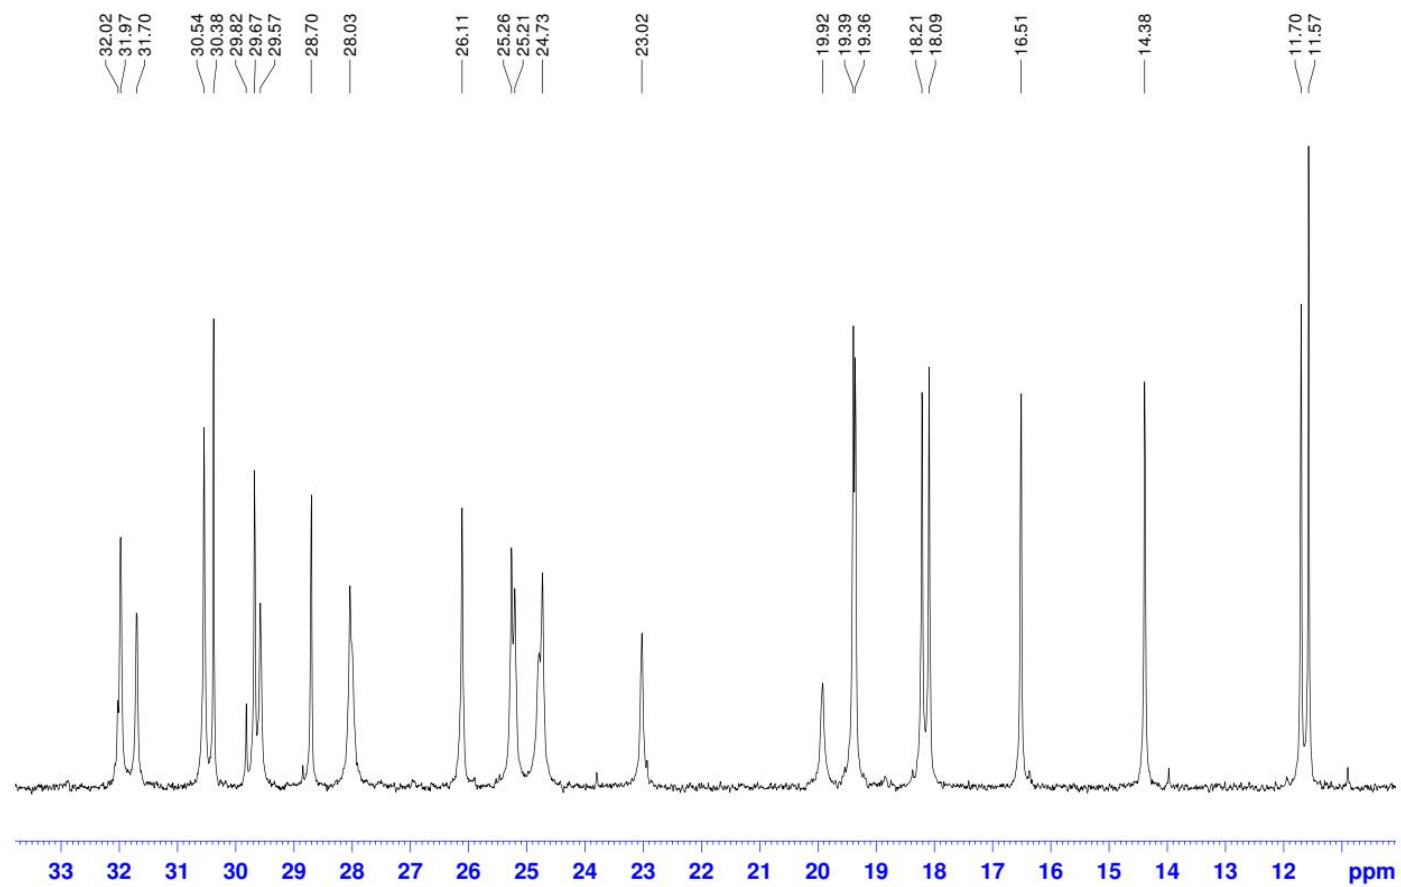

**Figure S6.** Enlarged  $^{13}\text{C}$  NMR spectrum of **1** in pyridine- $d_5$  (100 MHz).

DEPT135 spectrum of **1** measured in pyridine-*d*<sub>5</sub> at 100 MHz

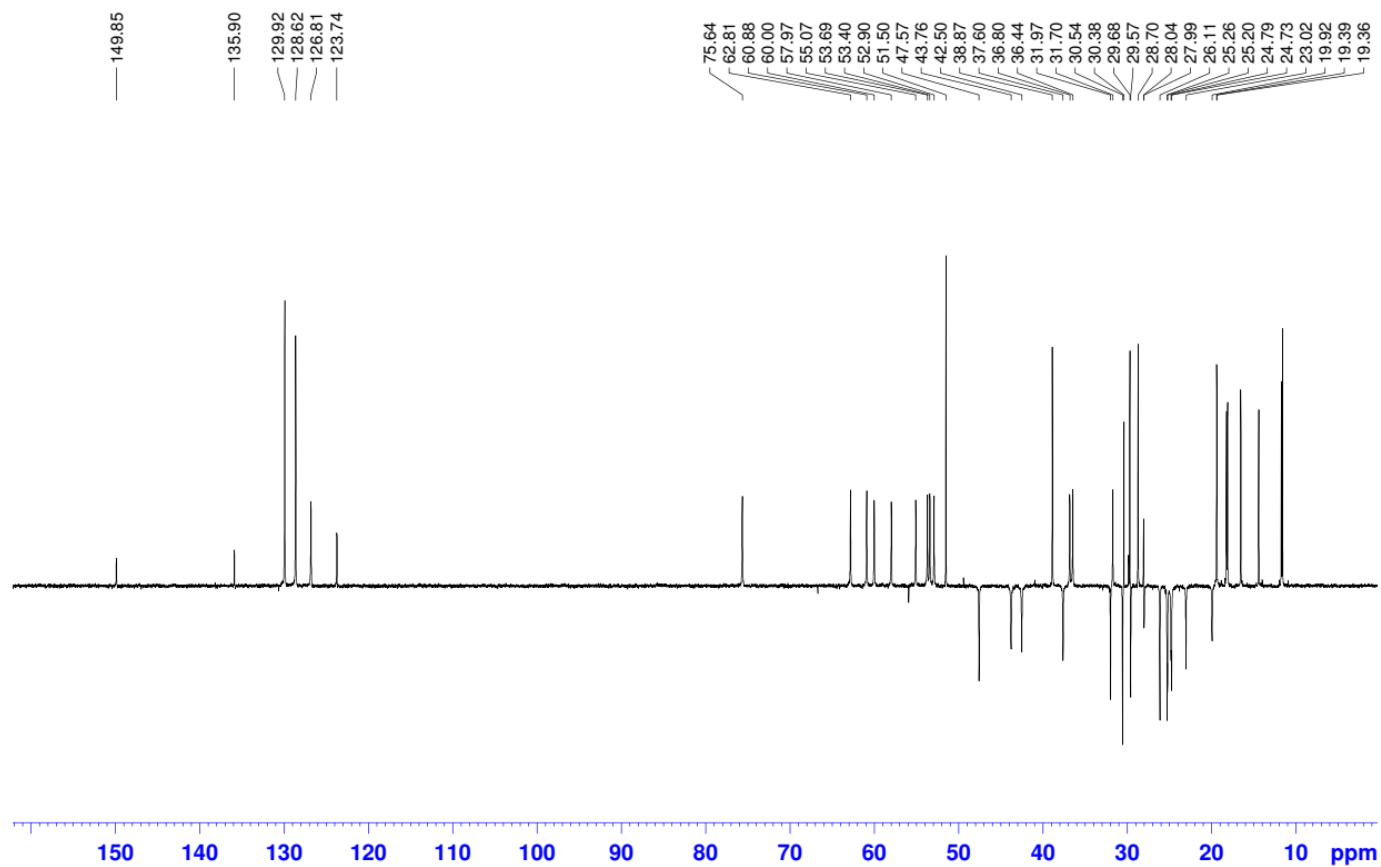

**Figure S7.** DEPT135 NMR spectrum of **1** in pyridine-*d*<sub>5</sub> (100 MHz).

DEPT135 spectrum of **1** measured in pyridine-*d*<sub>5</sub> at 100 MHz

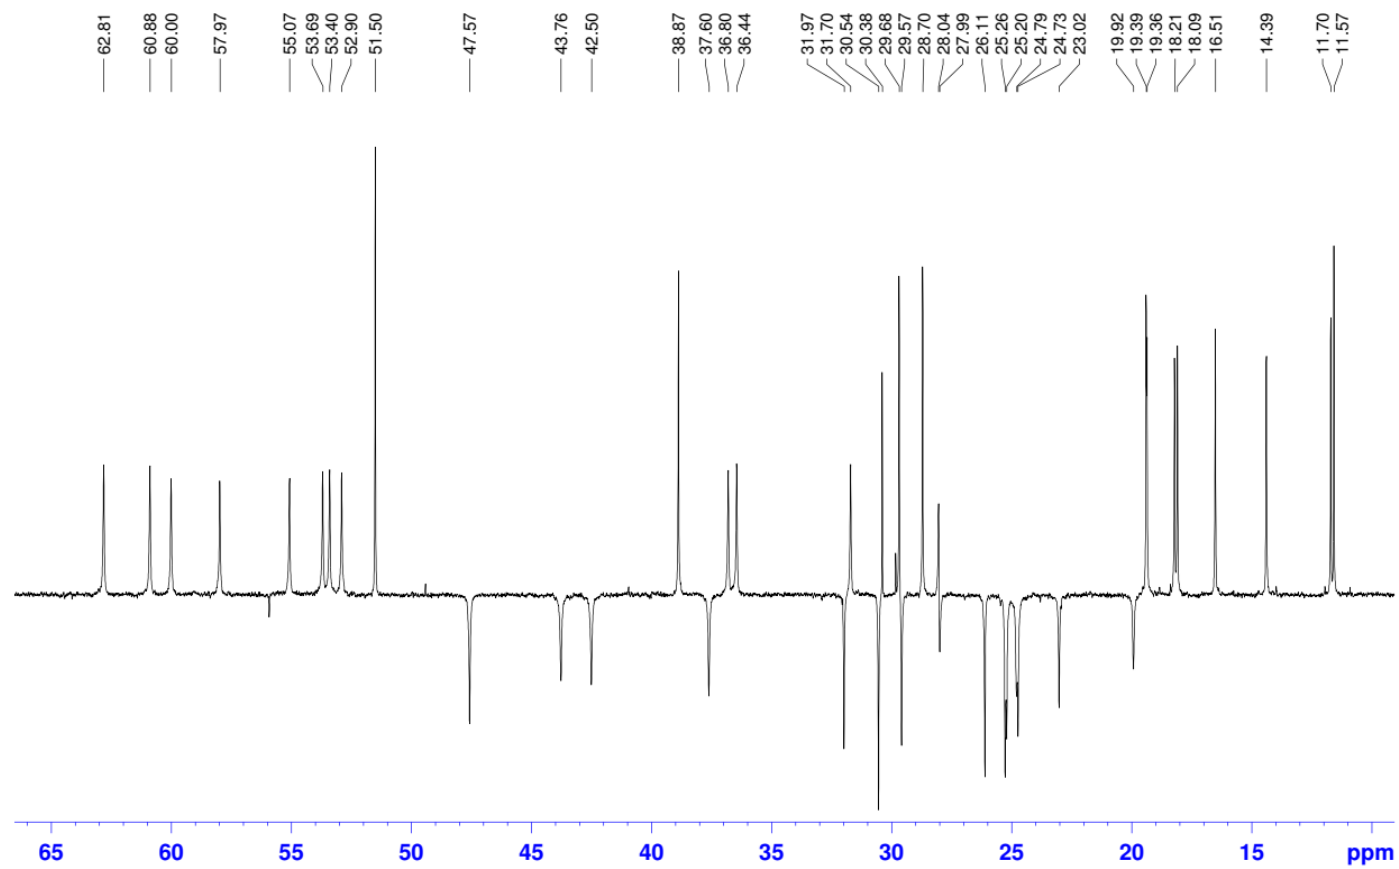

**Figure S8.** Enlarged DEPT135 NMR spectrum of **1** in pyridine-*d*<sub>5</sub> (100 MHz).

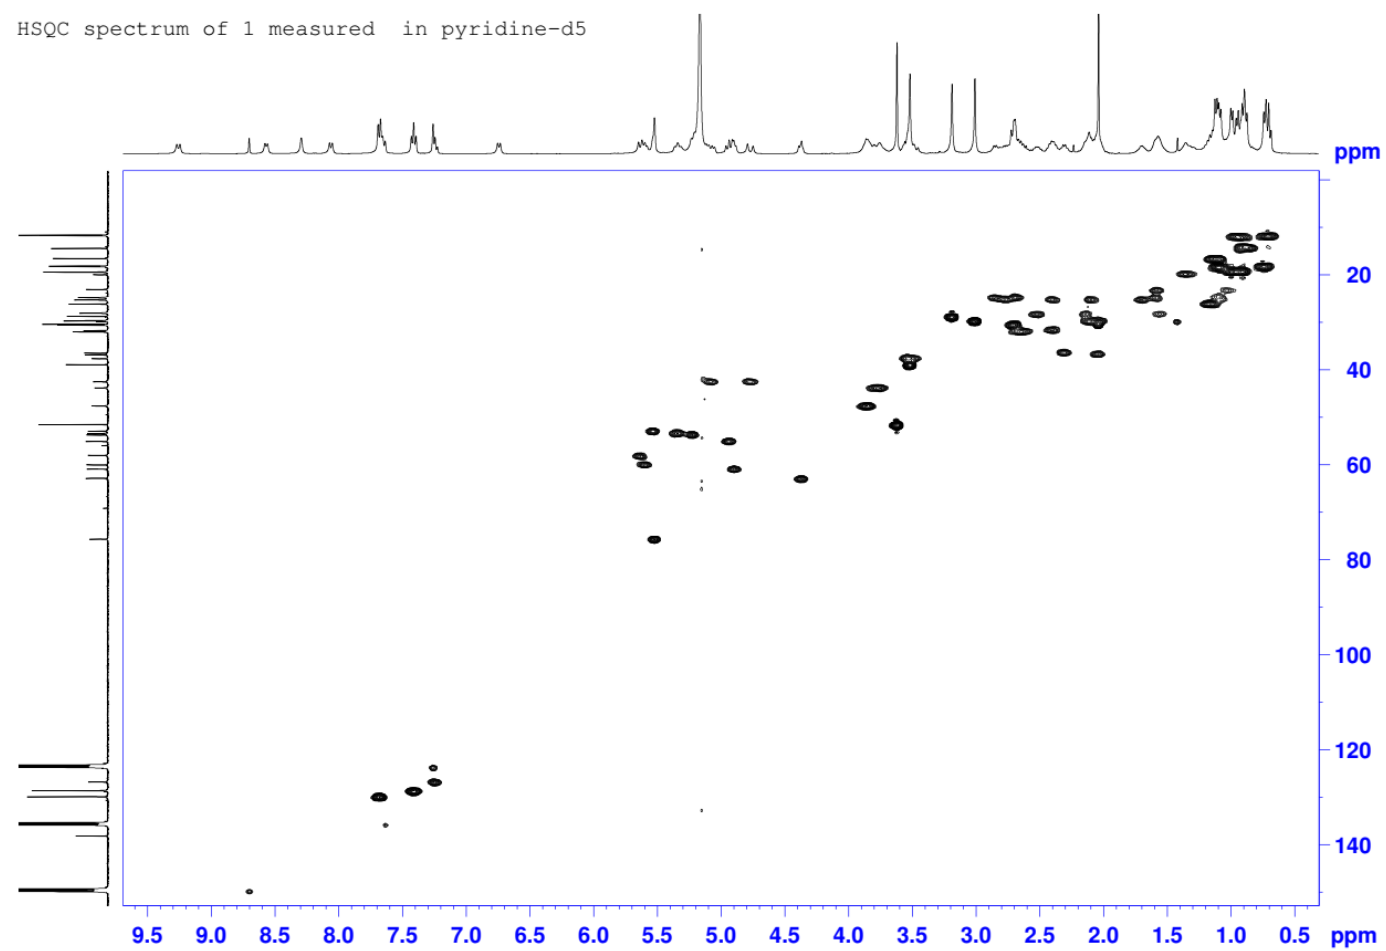

**Figure S9.** HSQC spectrum of **1** in pyridine- $d_5$ .

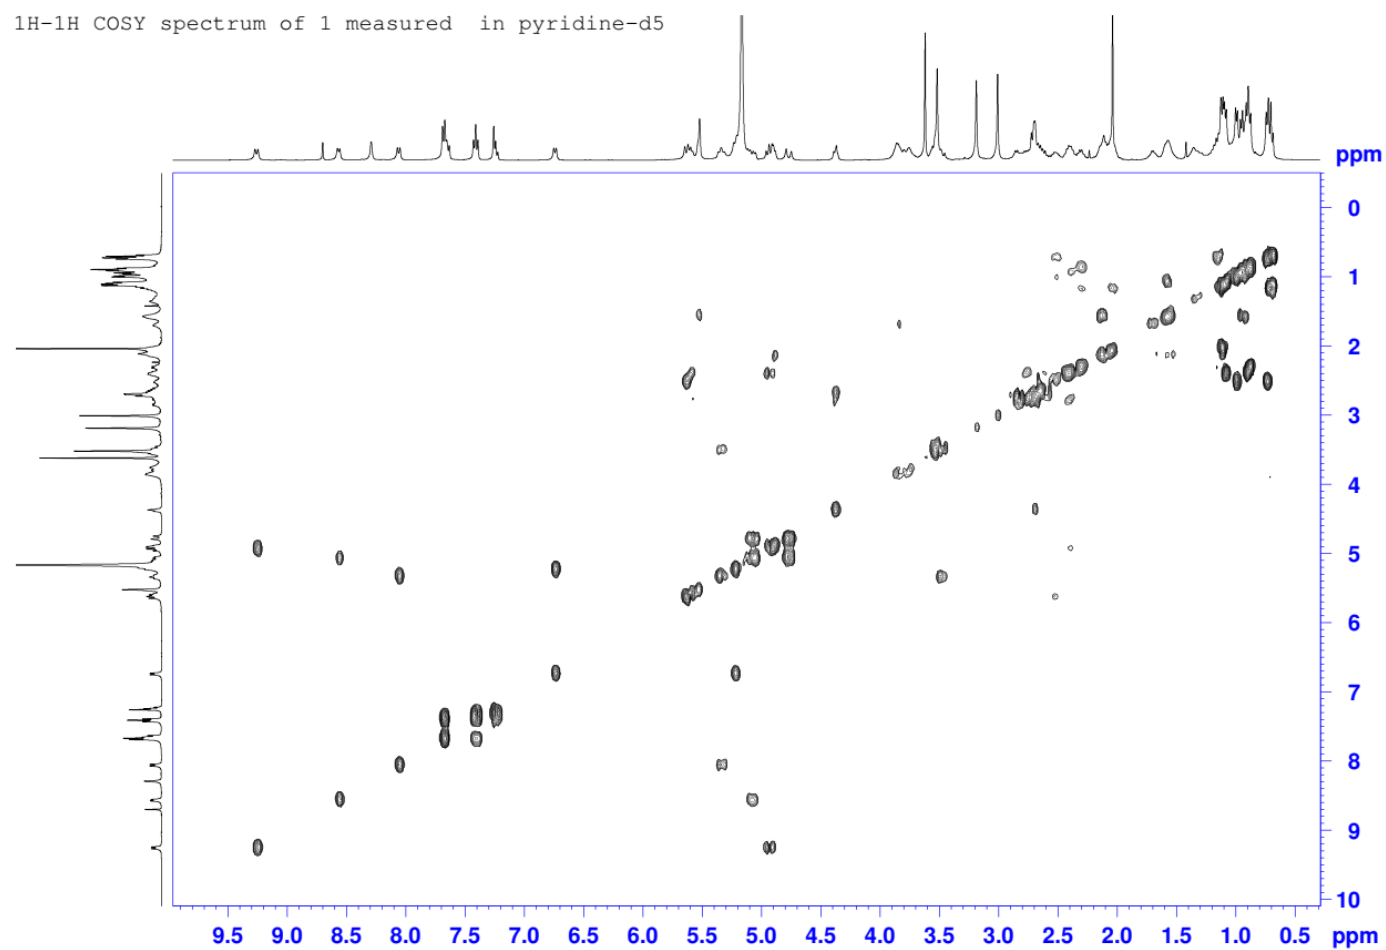

**Figure S10.**  $^1\text{H}$ - $^1\text{H}$  COSY spectrum of **1** in pyridine- $d_5$ .

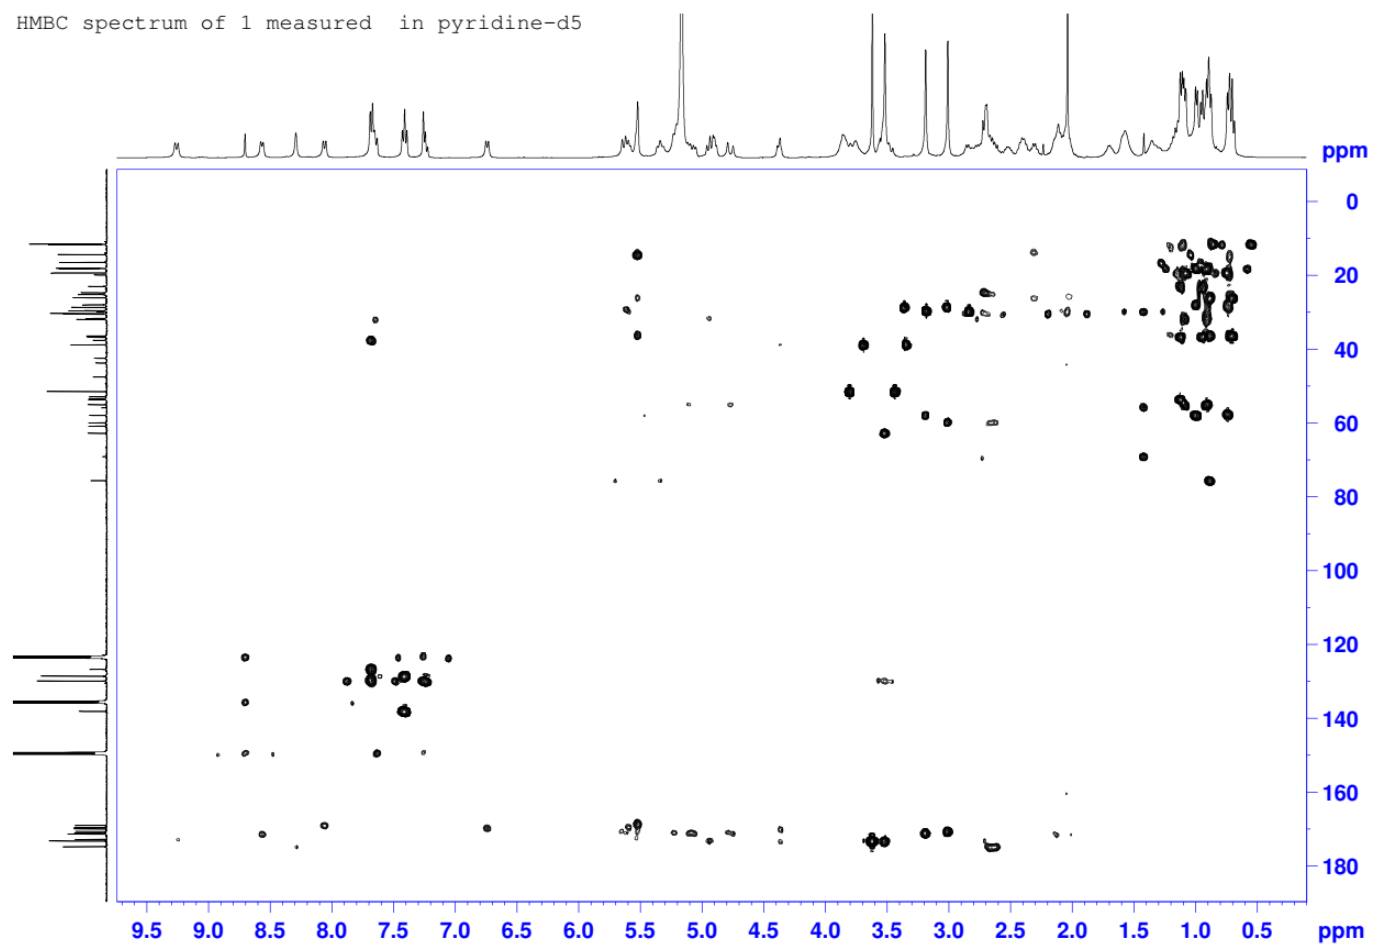

**Figure S11.** HMBC spectrum of **1** in pyridine- $d_5$ .

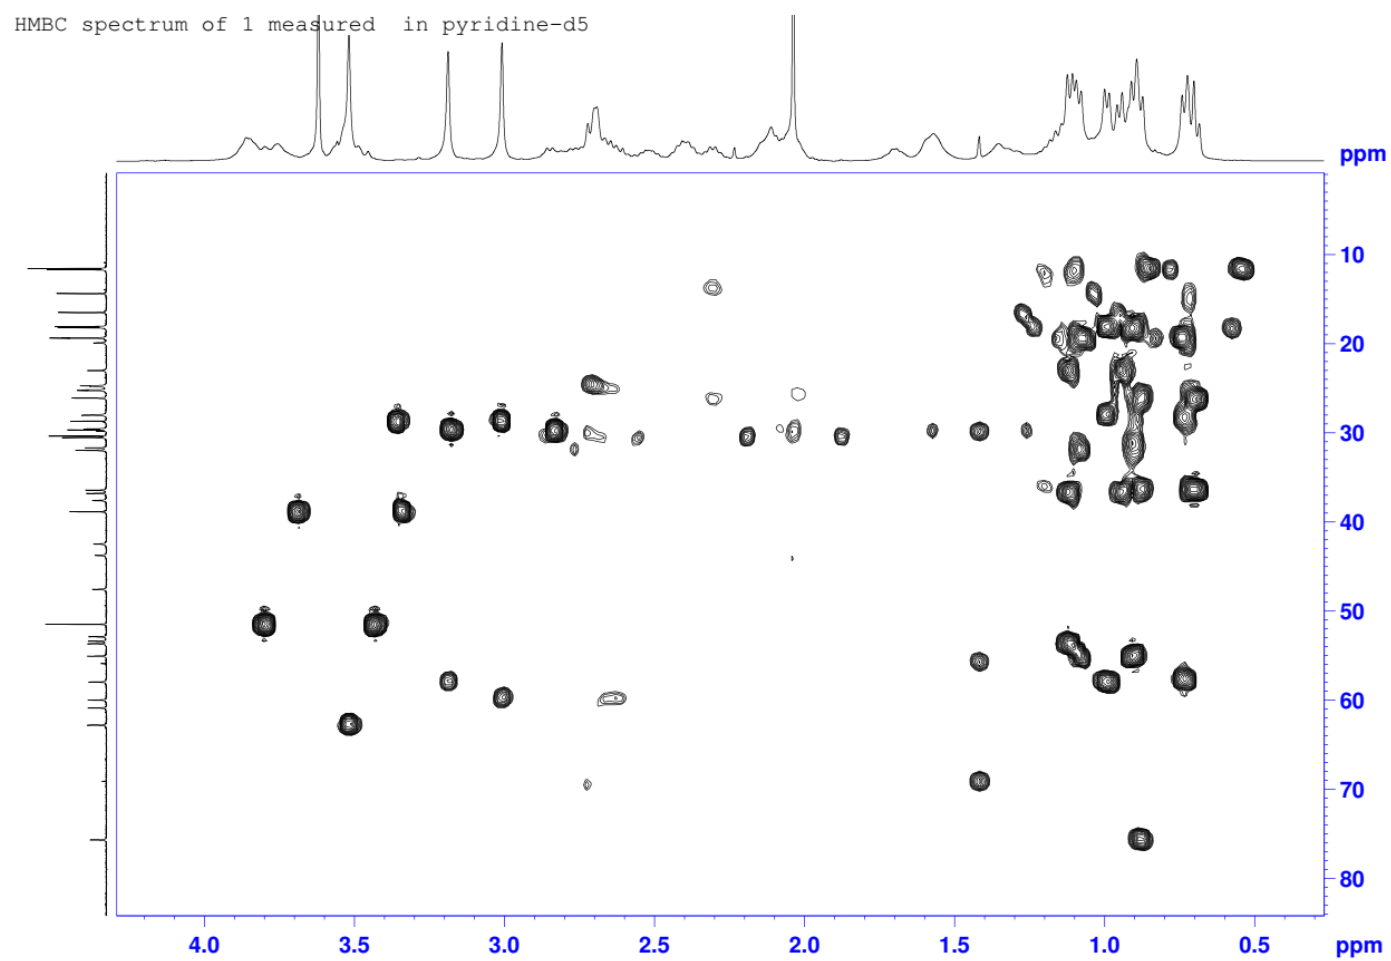

**Figure S12.** Enlarged HMBC spectrum of **1** in pyridine-*d*<sub>5</sub>.

HMBC spectrum of 1 measured in pyridine-d<sub>5</sub>

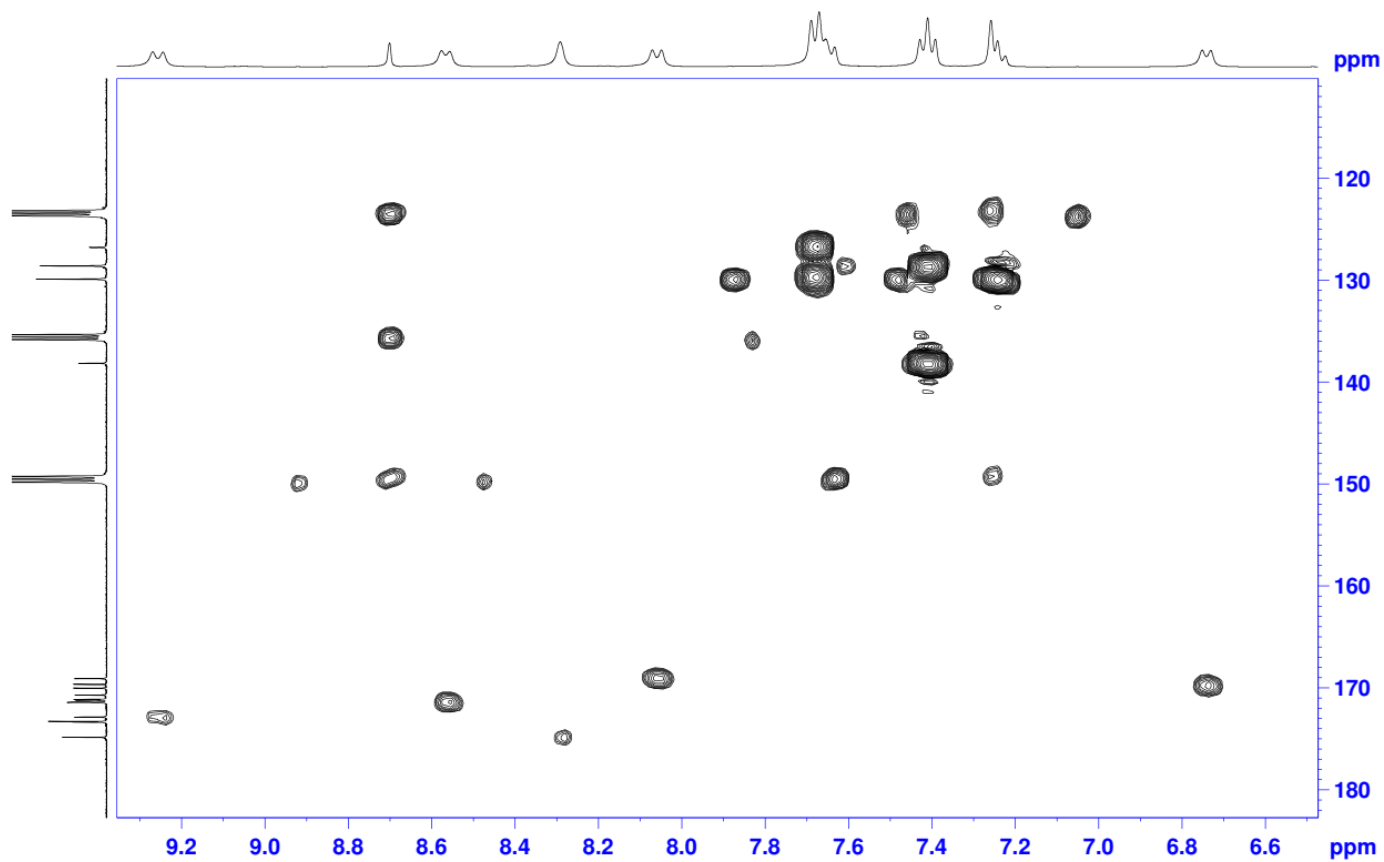

**Figure S13.** Enlarged HMBC spectrum of **1** in pyridine-*d*<sub>5</sub>.

HMBC spectrum of 1 measured in pyridine-d<sub>5</sub>

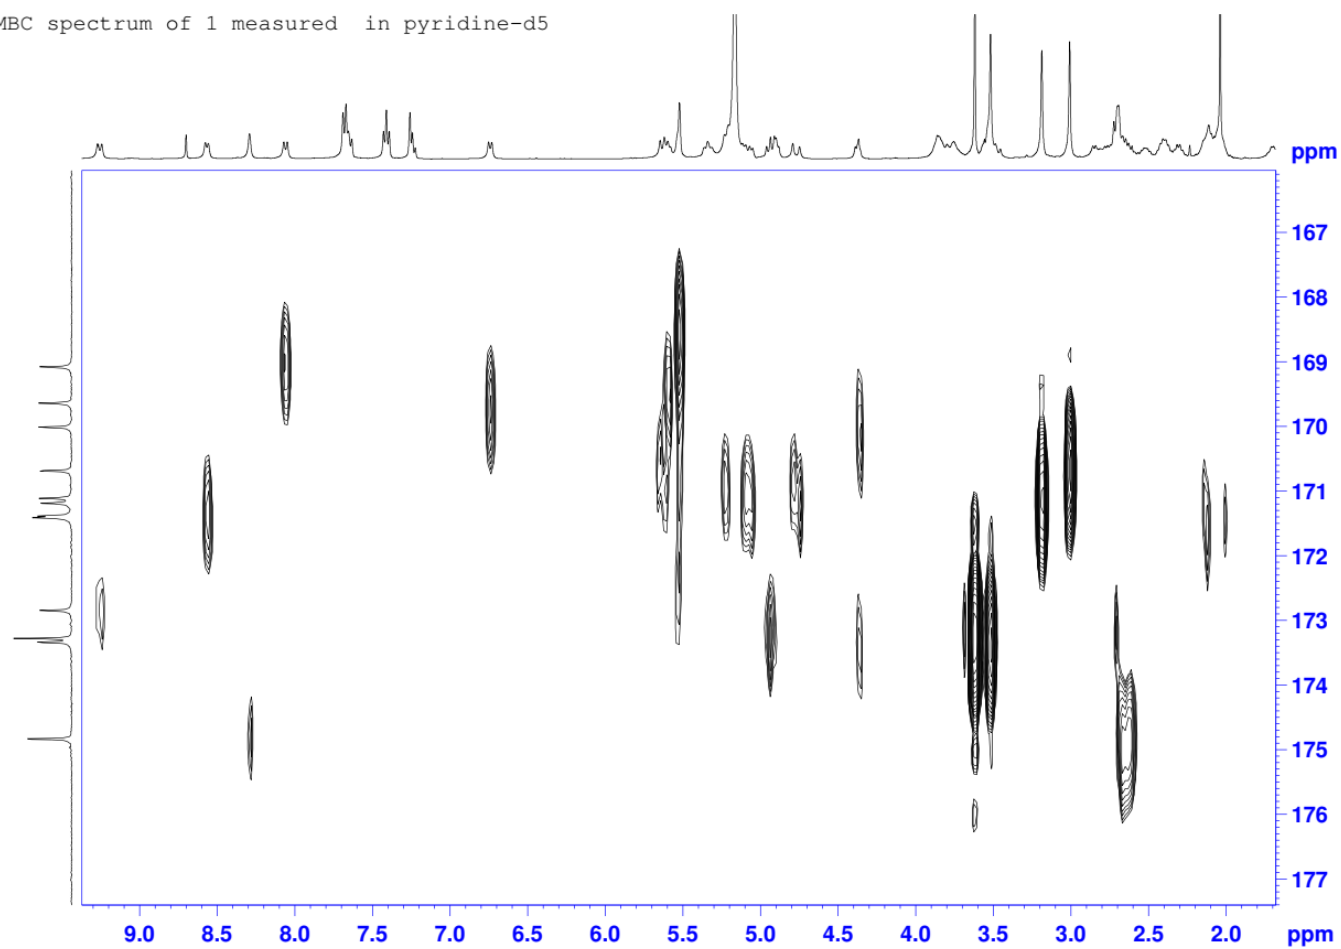

**Figure S14.** Enlarged HMBC spectrum of **1** in pyridine-*d*<sub>5</sub>.

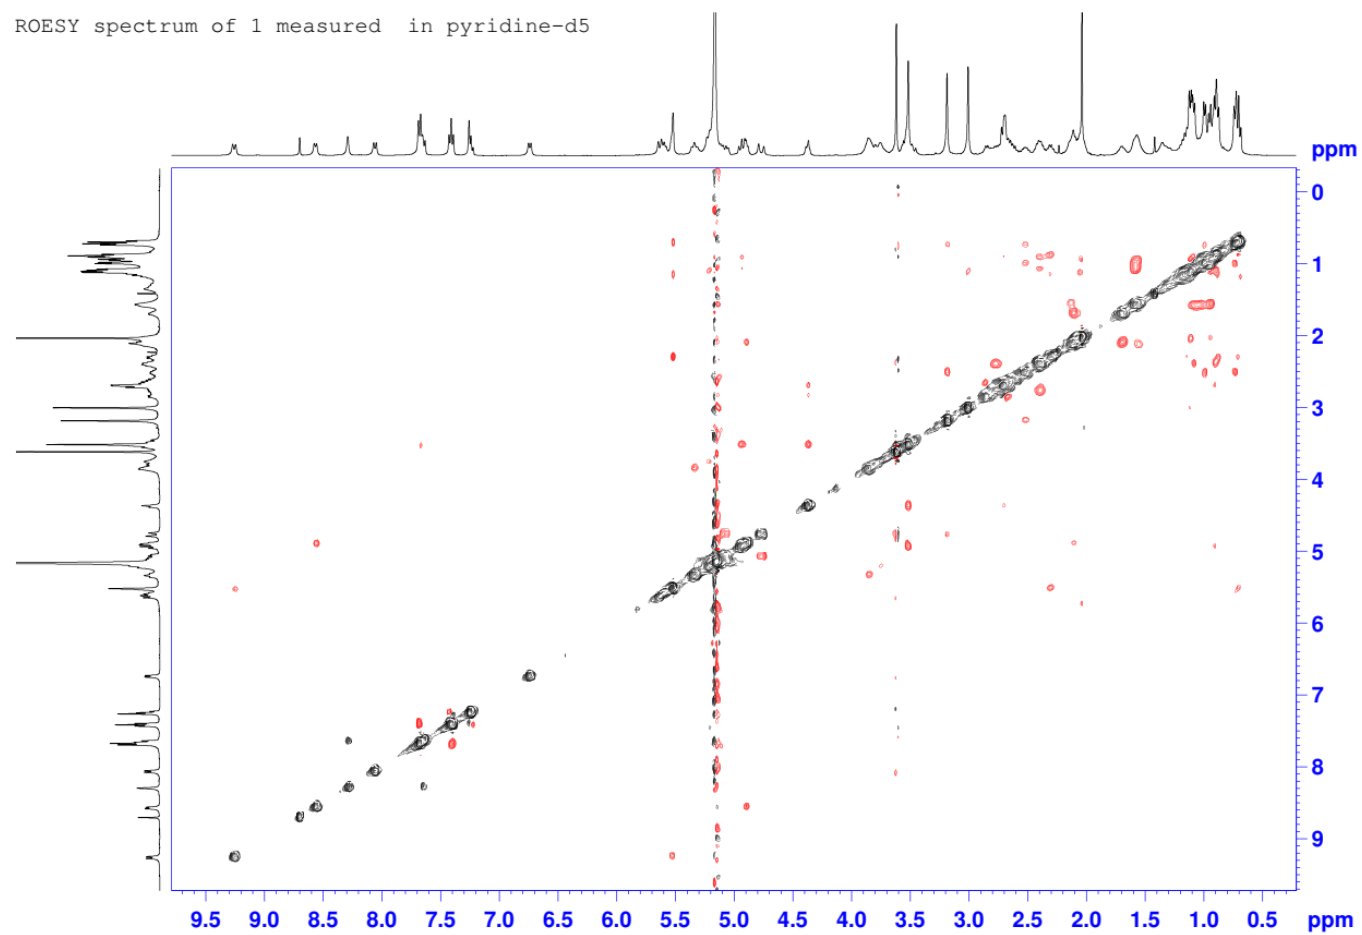

**Figure S15.** ROESY spectrum of **1** in pyridine- $d_5$ .

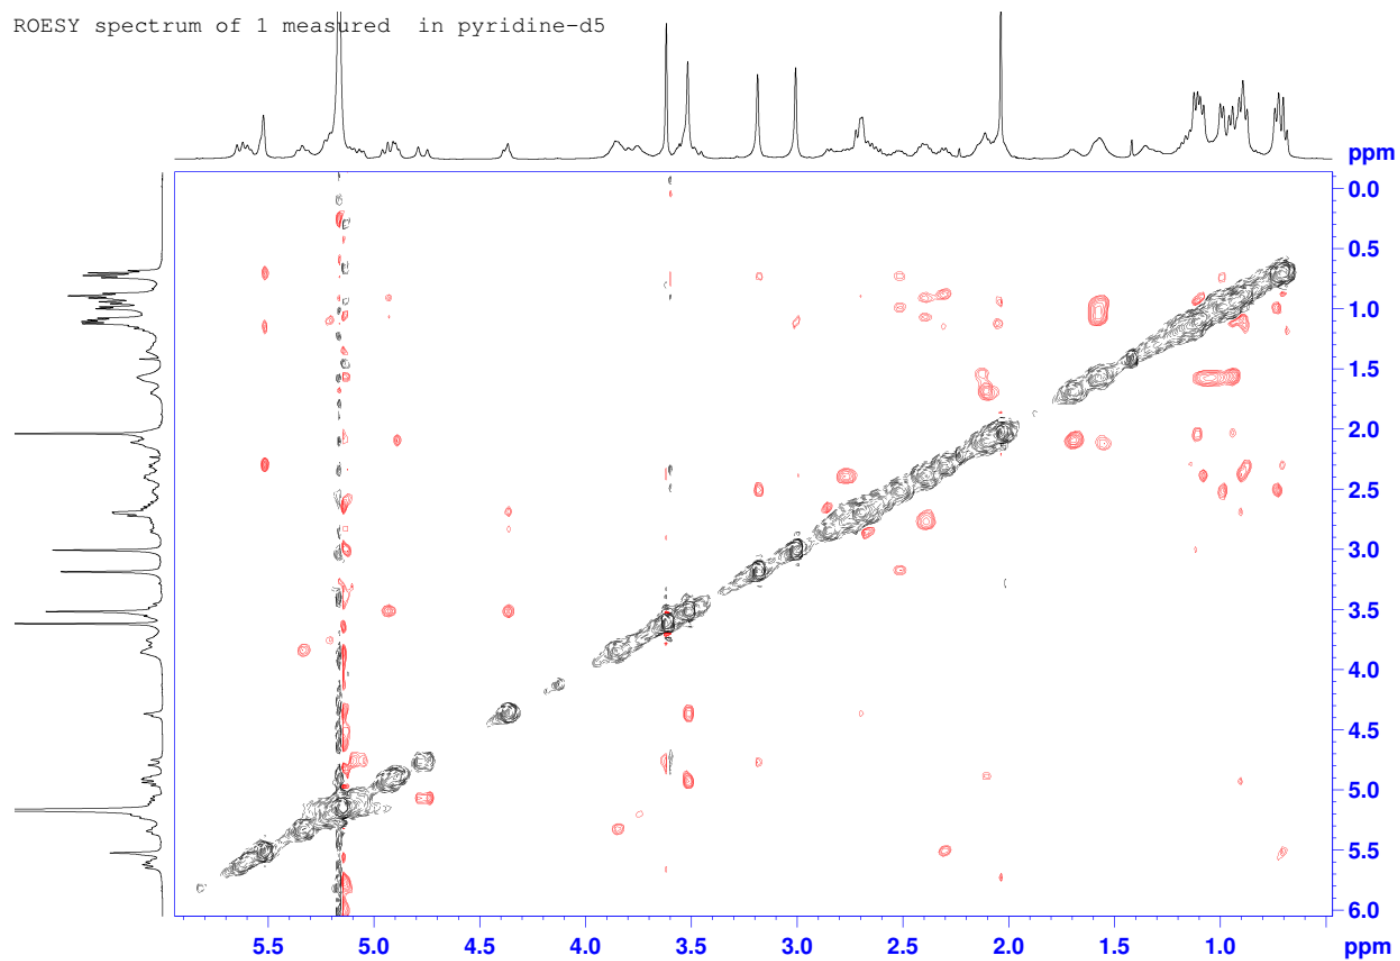

**Figure S16.** Enlarged ROESY spectrum of **1** in pyridine- $d_5$ .

S296t #157-287 RT: 0.33-0.60 AV: 33 NL: 6.82E6  
T: FTMS +p ESI Full ms [200.0000-2000.0000]

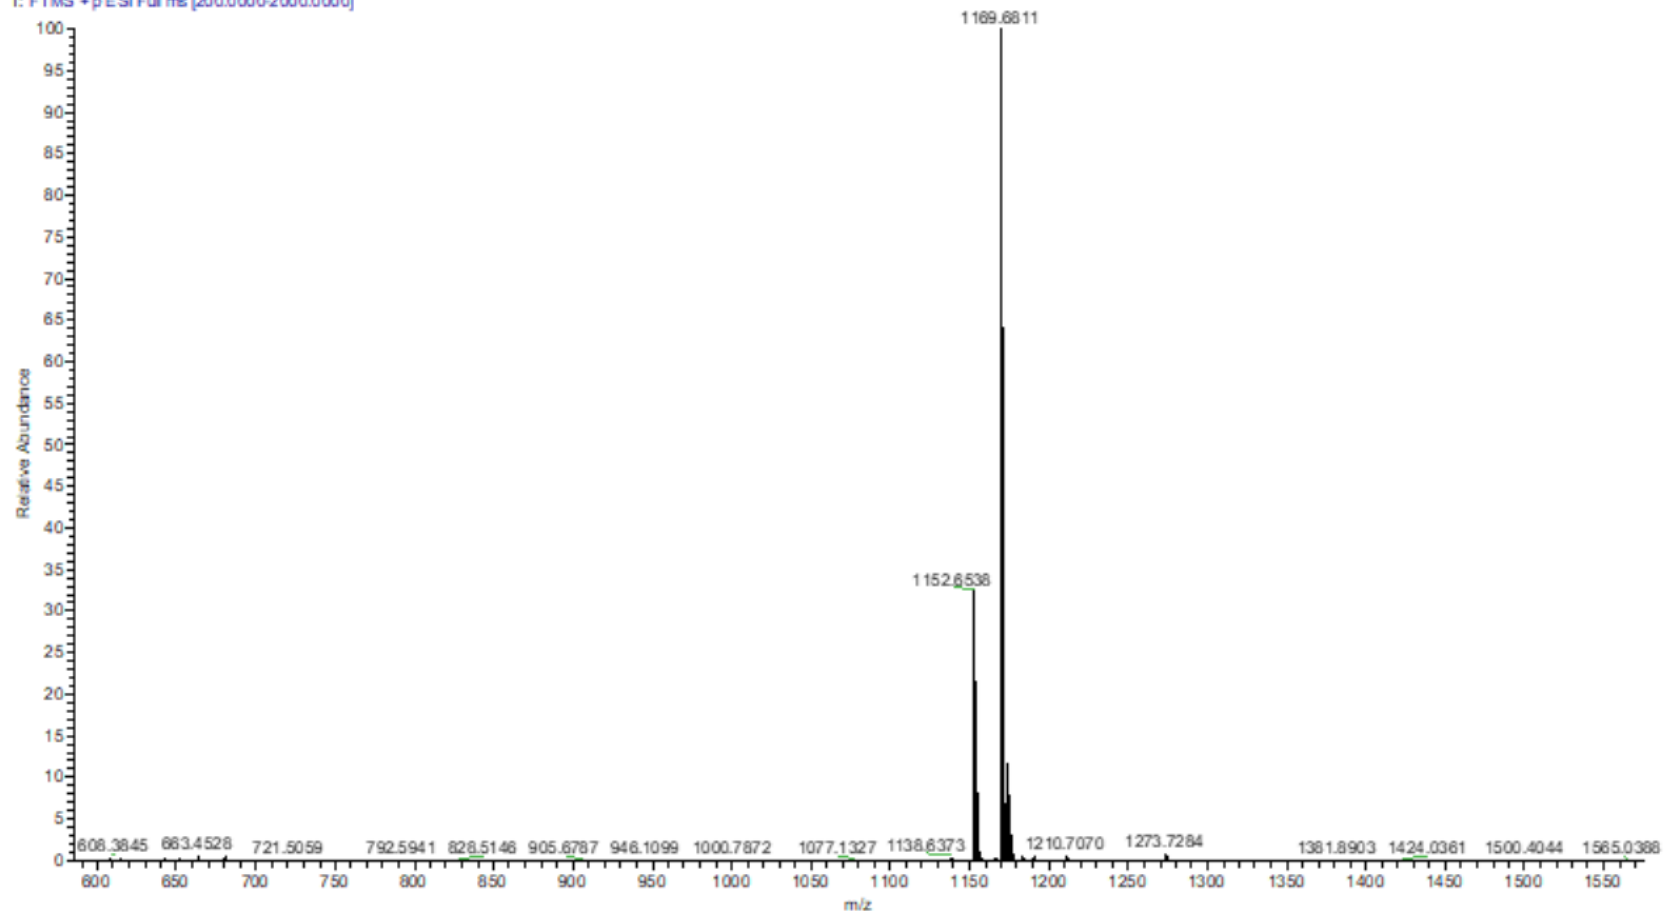

Figure S17. HRESIMS spectrum of **2**.

$^1\text{H}$  NMR spectrum of **2** measured in pyridine- $d_5$  at 400 MHz

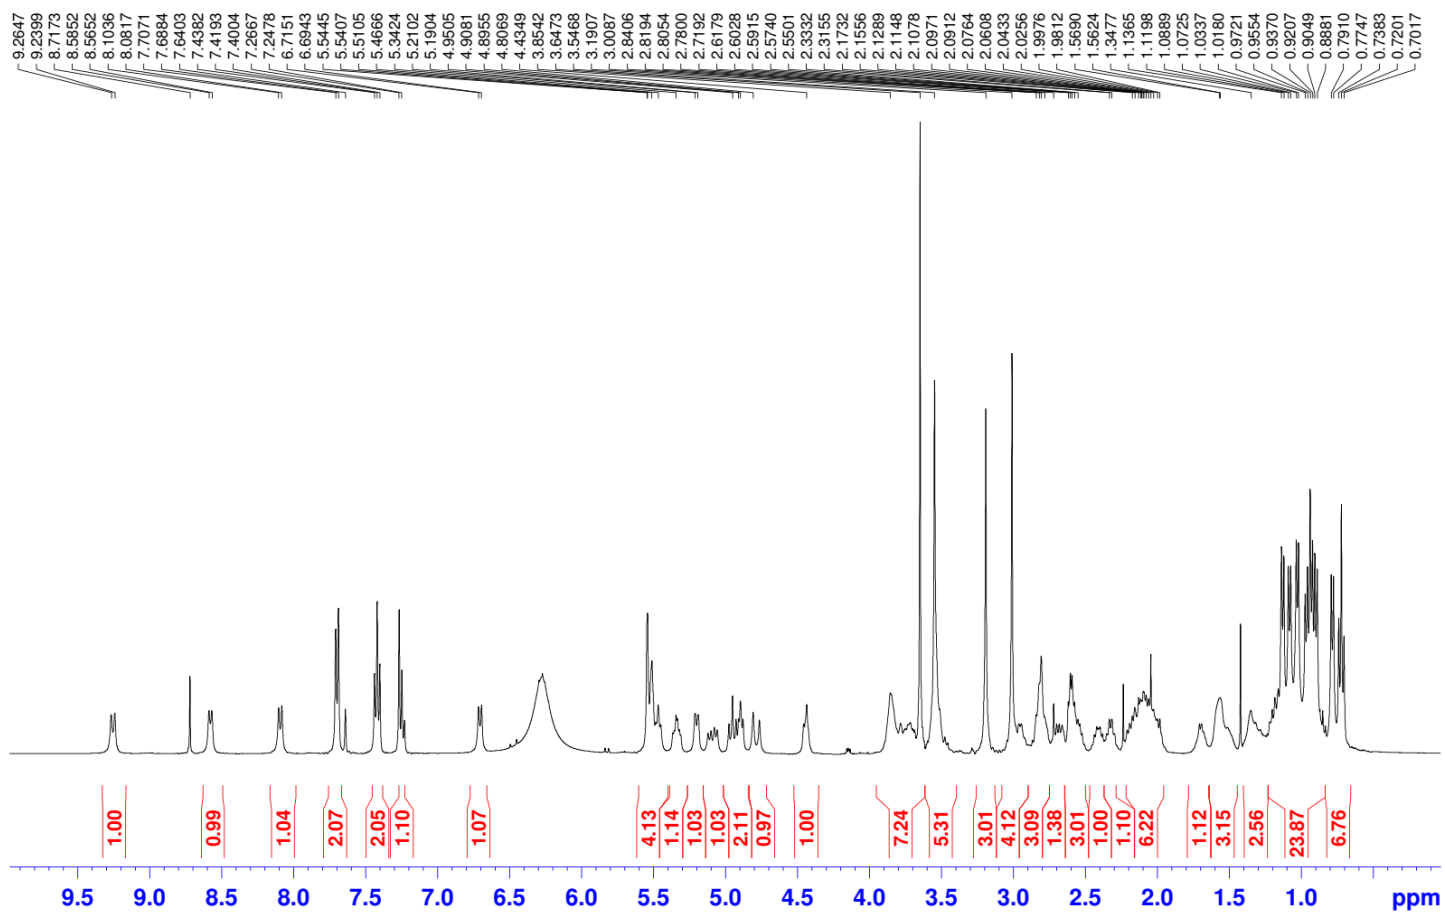

**Figure S18.**  $^1\text{H}$  NMR spectrum of **2** in pyridine- $d_5$  (400 MHz).

$^{13}\text{C}$  NMR spectrum of **2** measured in pyridine- $d_5$  at 100 MHz

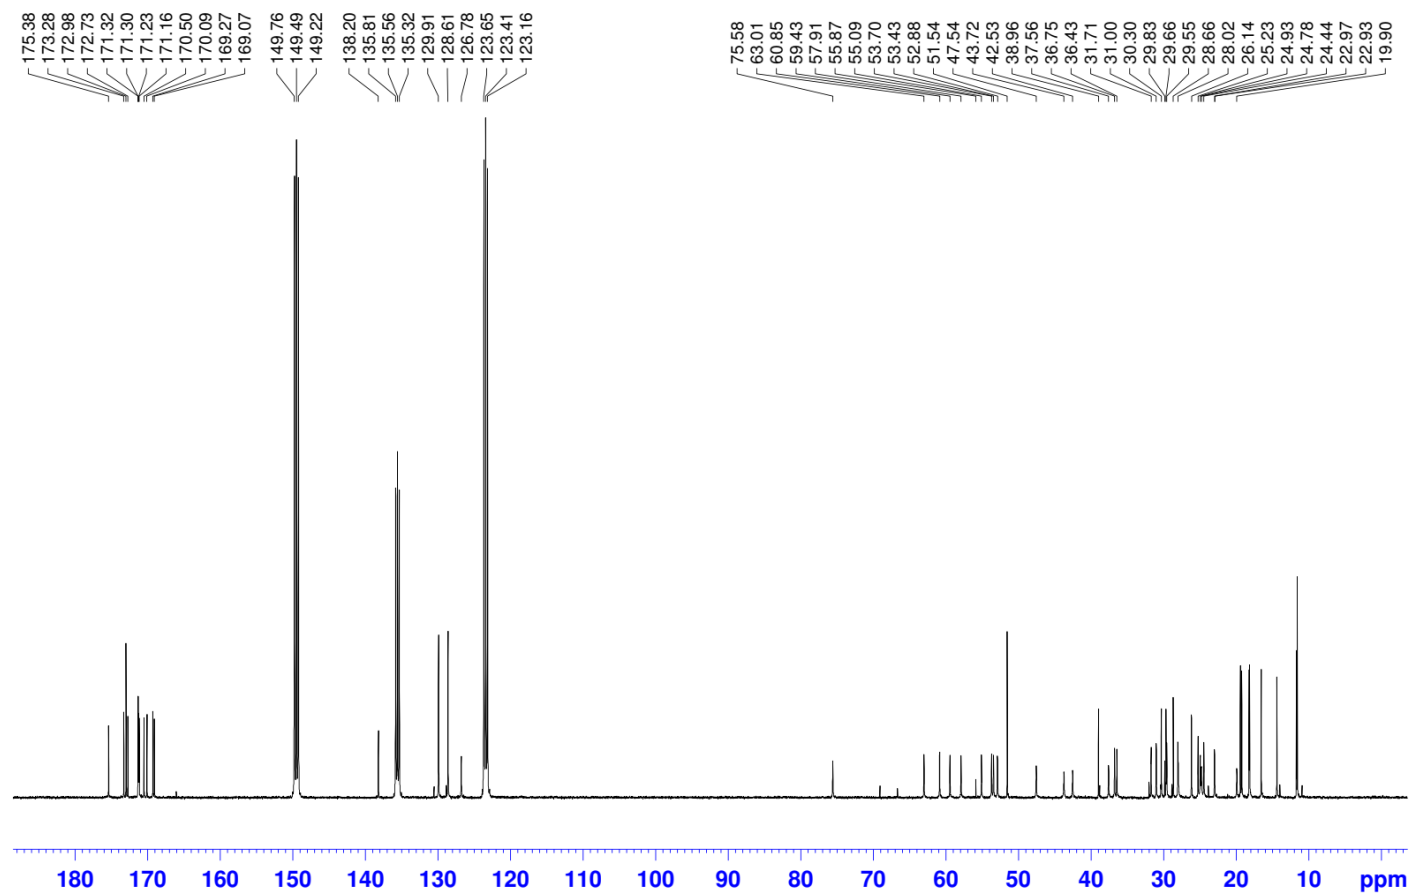

**Figure S19.**  $^{13}\text{C}$  NMR spectrum of **2** in pyridine- $d_5$  (100 MHz).

$^{13}\text{C}$  NMR spectrum of **2** measured in pyridine- $d_5$  at 100 MHz

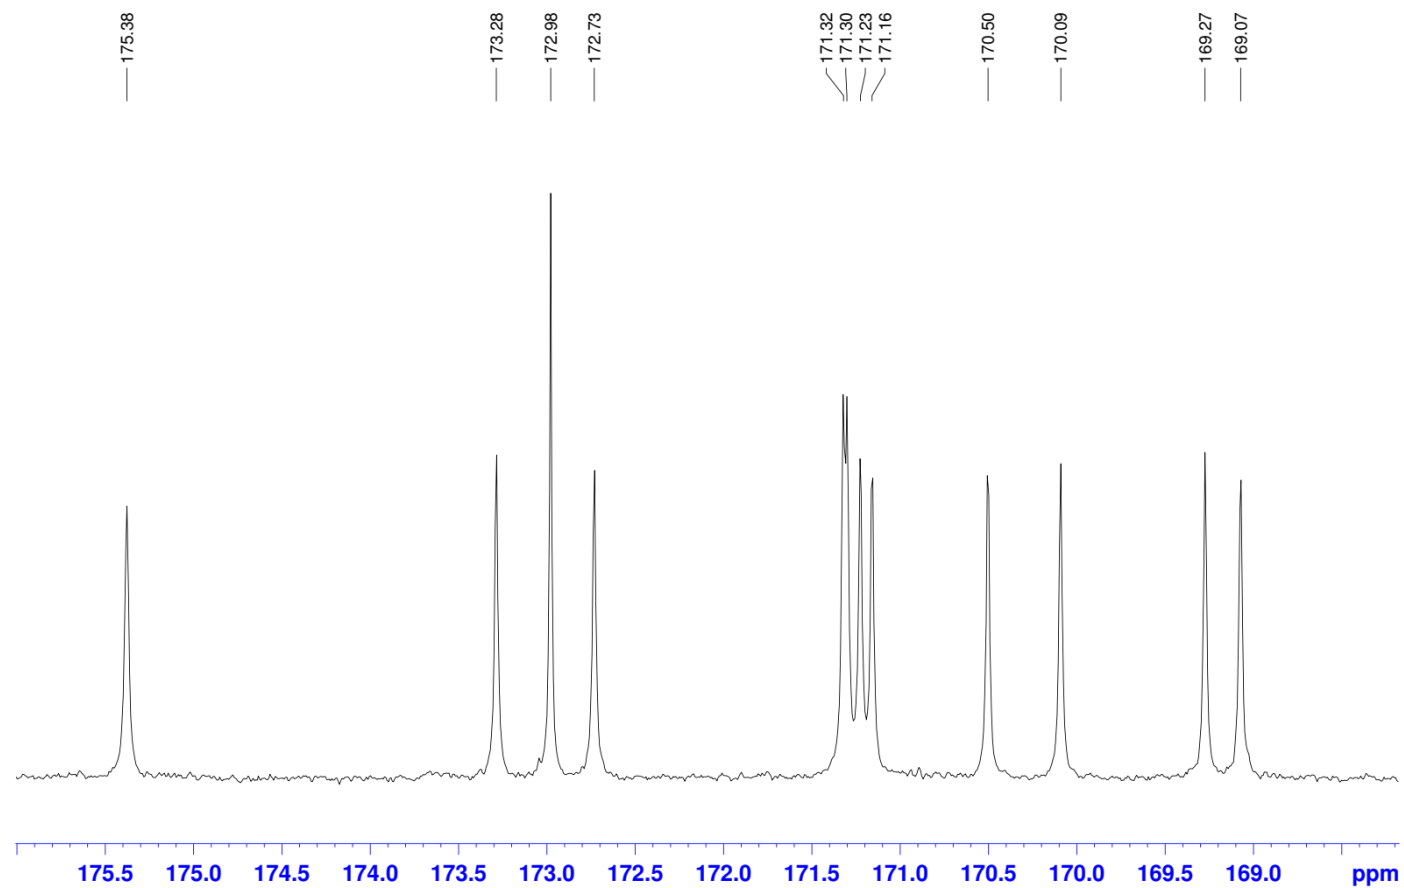

**Figure S20.** Enlarged  $^{13}\text{C}$  NMR spectrum of **2** in pyridine- $d_5$  (100 MHz).

$^{13}\text{C}$  NMR spectrum of **2** measured in pyridine- $d_5$  at 100 MHz

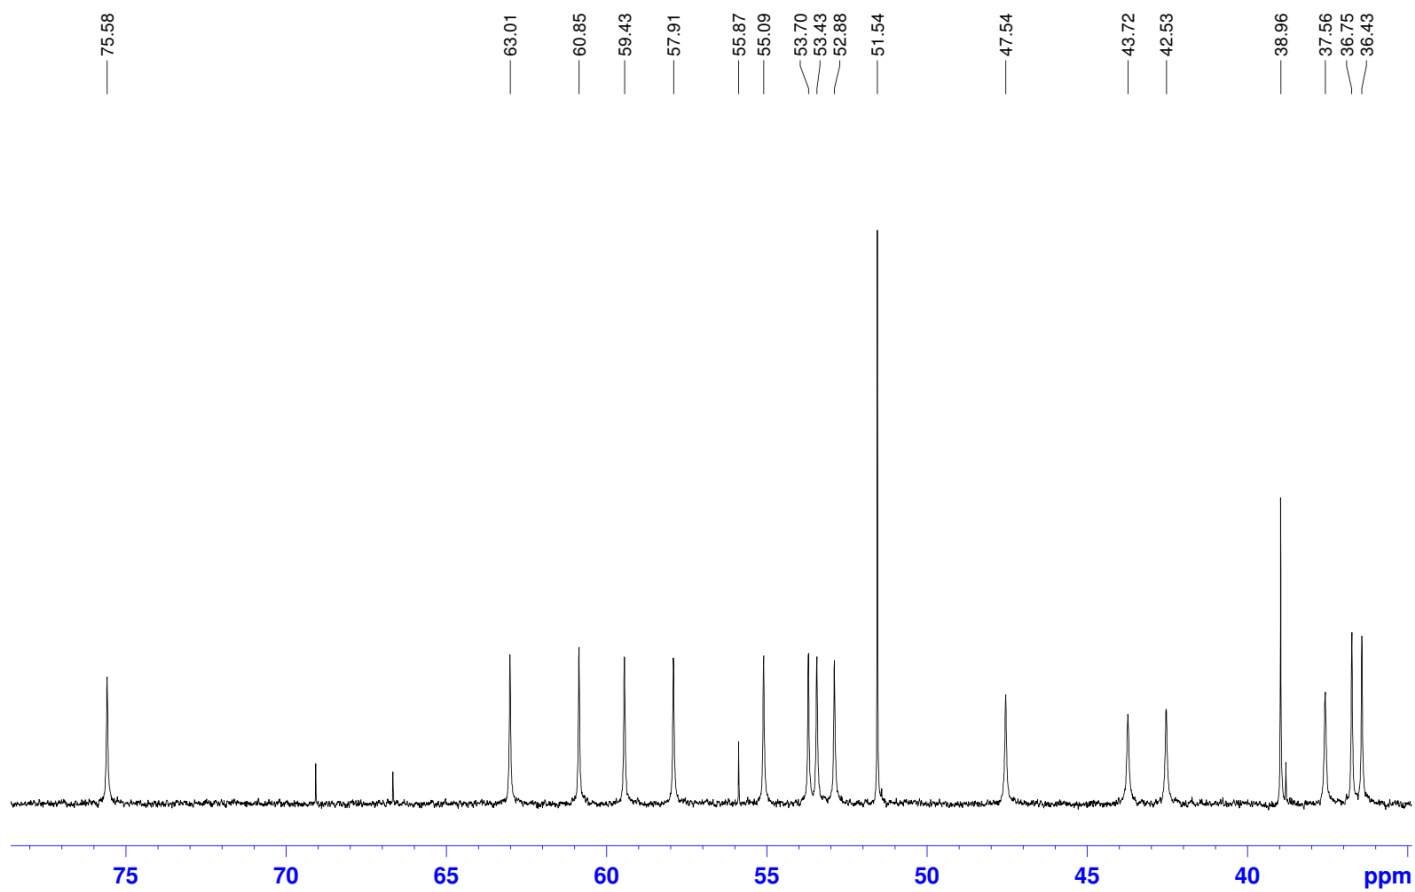

**Figure S21.** Enlarged  $^{13}\text{C}$  NMR spectrum of **2** in pyridine- $d_5$  (100 MHz).

$^{13}\text{C}$  NMR spectrum of **2** measured in pyridine- $d_5$  at 100 MHz

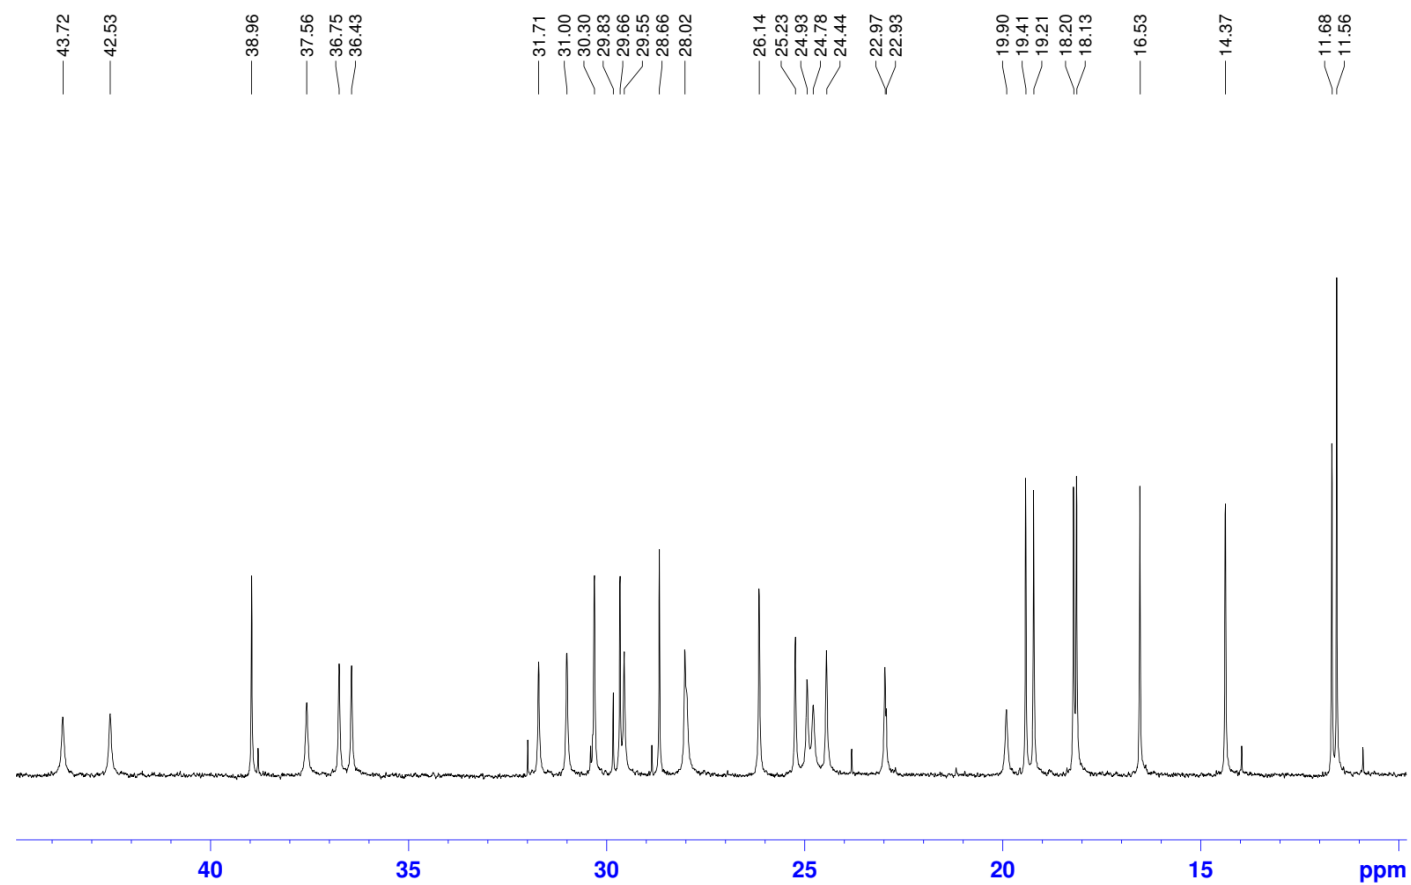

**Figure S22.** Enlarged  $^{13}\text{C}$  NMR spectrum of **2** in pyridine- $d_5$  (100 MHz).

DEPT135 spectrum of **2** measured in pyridine-*d*<sub>5</sub> at 100 MHz

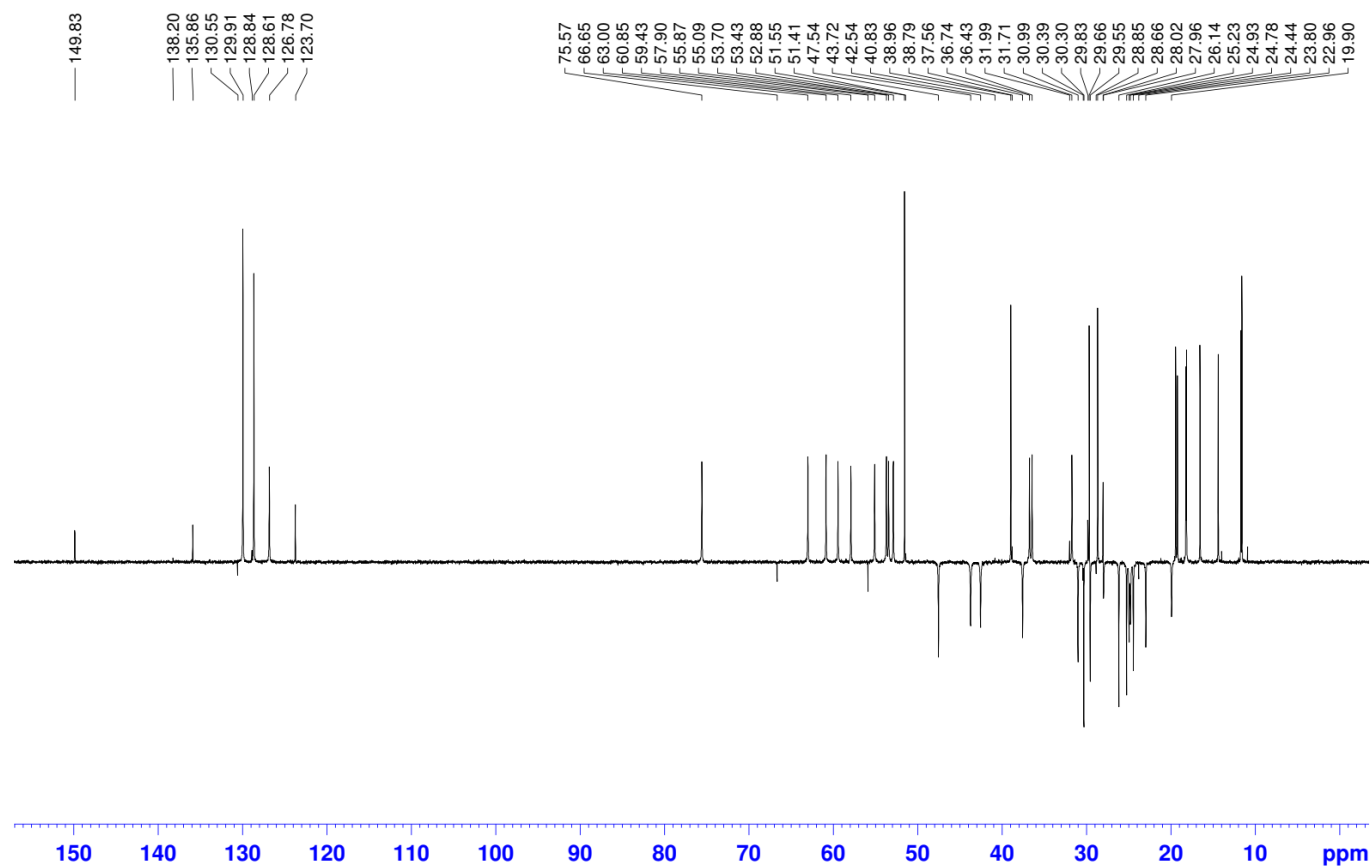

**Figure S23.** DEPT135 NMR spectrum of **2** in pyridine-*d*<sub>5</sub> (100 MHz).

DEPT135 spectrum of **2** measured in pyridine- $d_5$  at 100 MHz

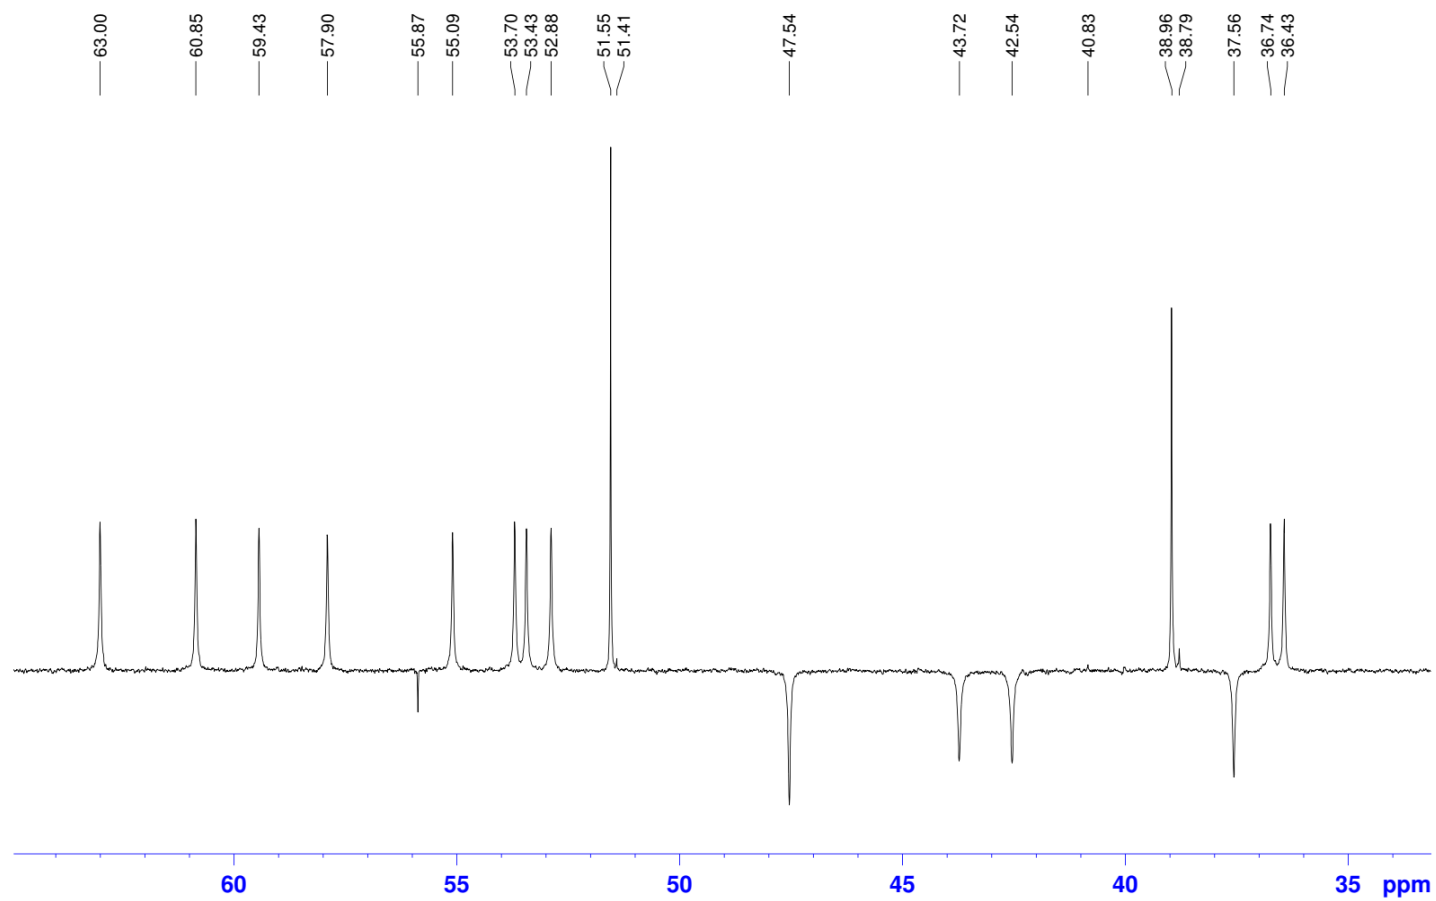

**Figure S24.** Enlarged DEPT135 NMR spectrum of **2** in pyridine- $d_5$  (100 MHz).

DEPT135 spectrum of **2** measured in pyridine-*d*<sub>5</sub> at 100 MHz

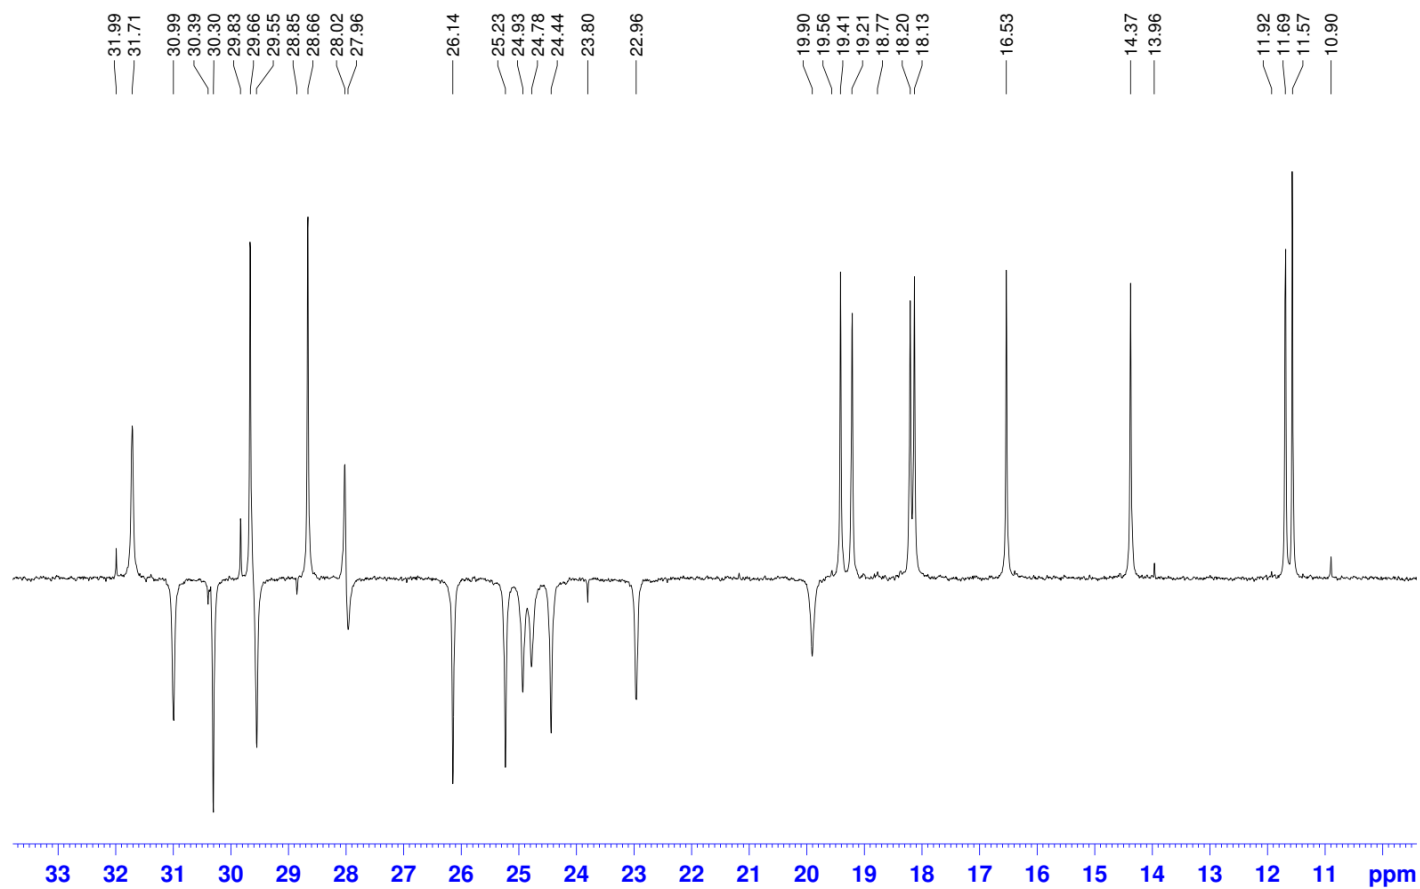

**Figure S25.** Enlarged DEPT135 NMR spectrum of **2** in pyridine-*d*<sub>5</sub> (100 MHz).

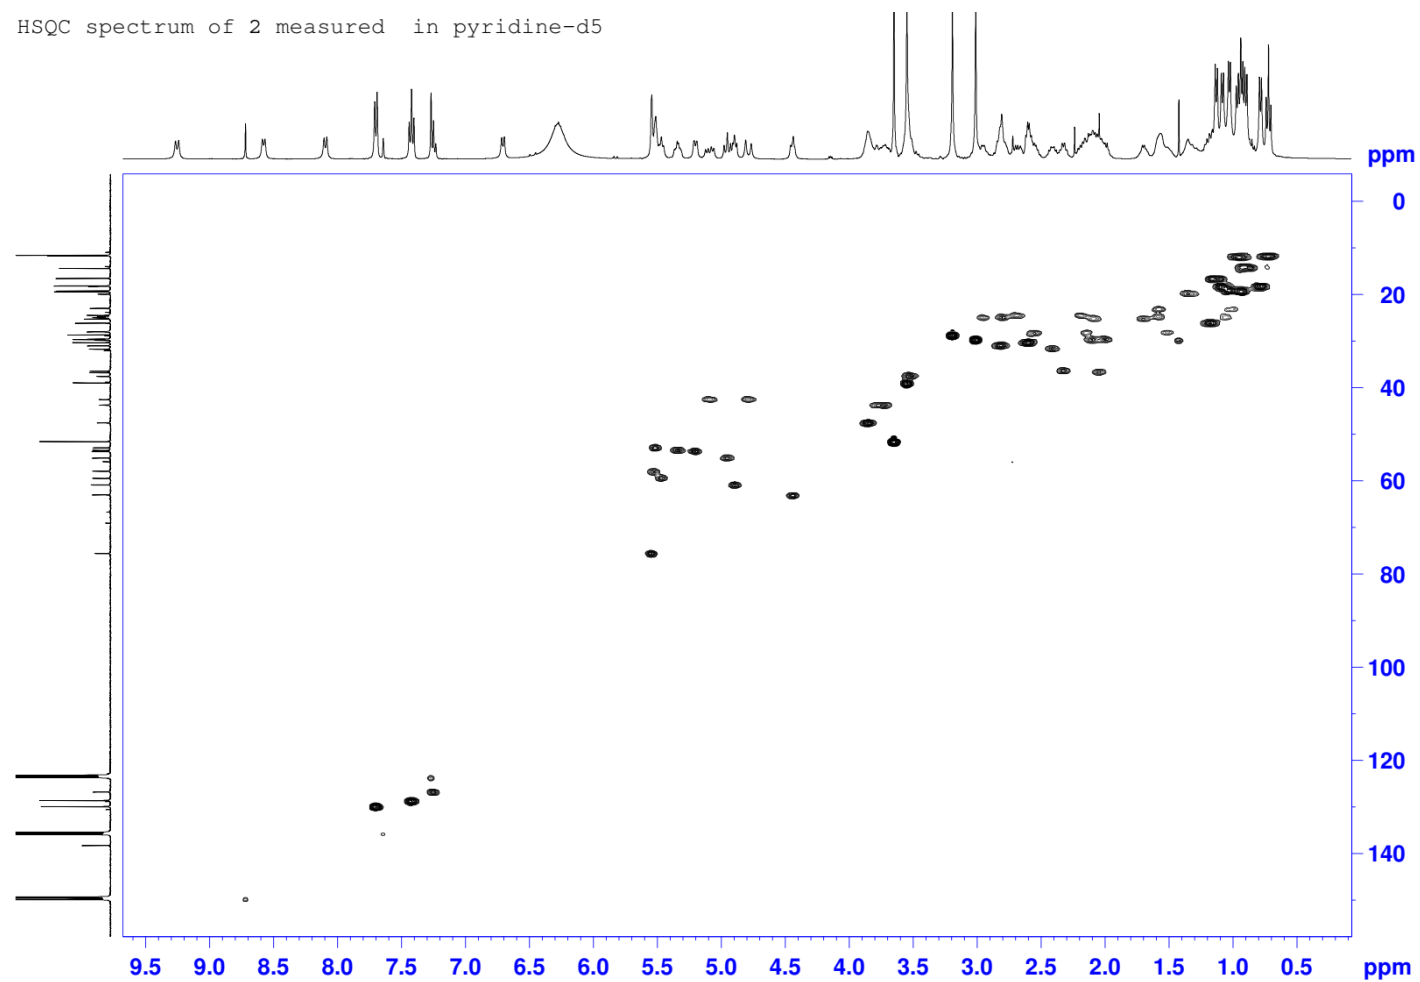

**Figure S26.** HSQC spectrum of **2** in pyridine-*d*<sub>5</sub>.

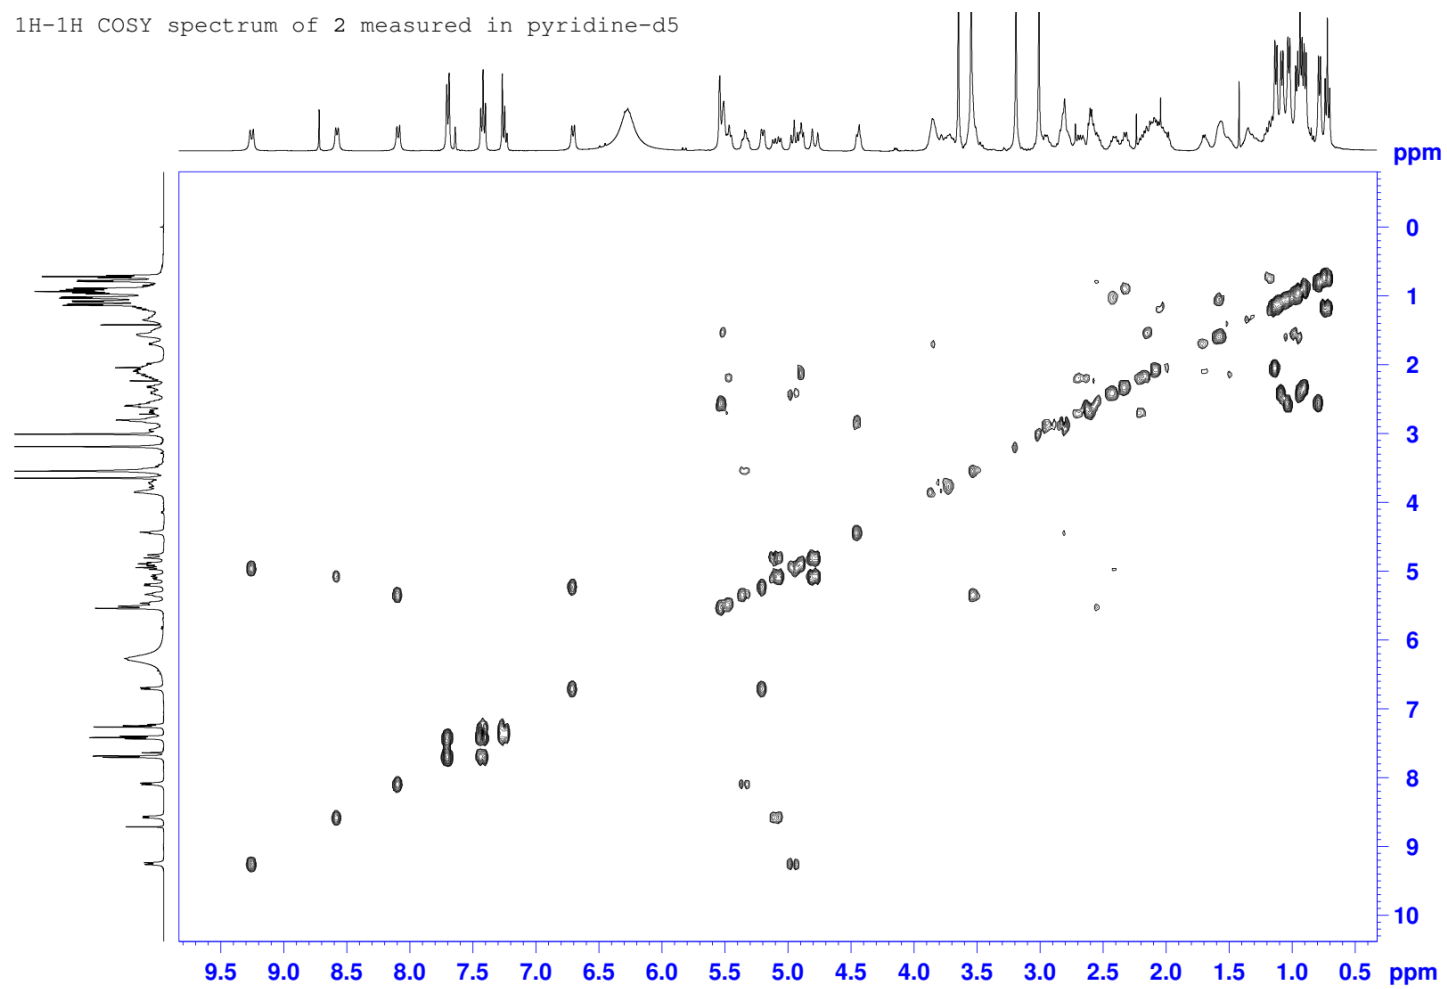

**Figure S27.**  $^1\text{H}$ - $^1\text{H}$  COSY spectrum of **2** in pyridine- $d_5$ .

HMBC spectrum of 2 measured in pyridine-d<sub>5</sub>

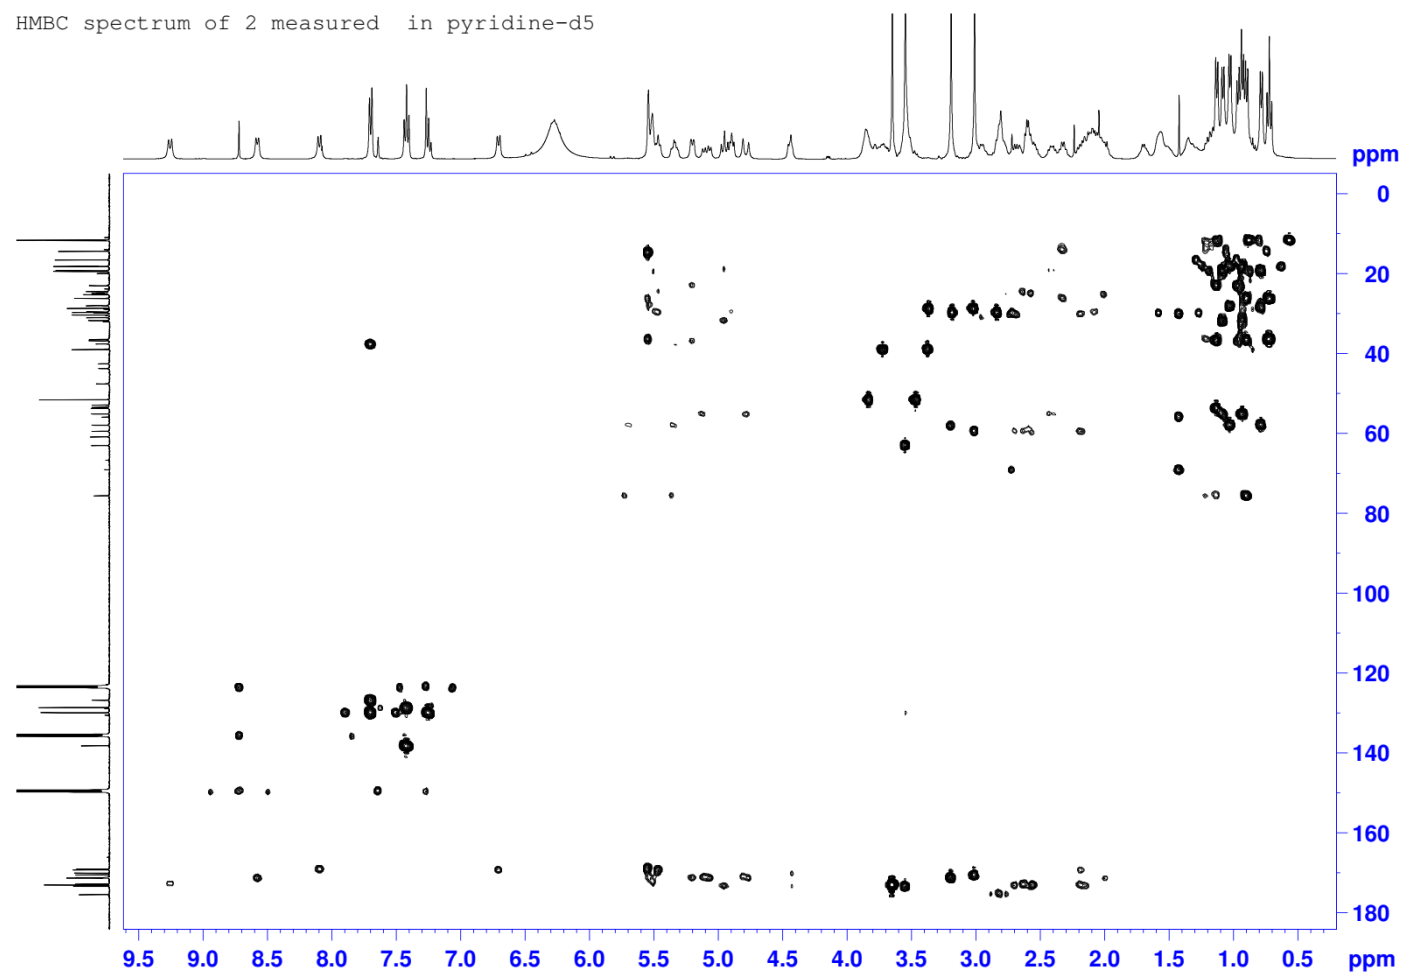

**Figure S28.** HMBC spectrum of **2** in pyridine-*d*<sub>5</sub>.

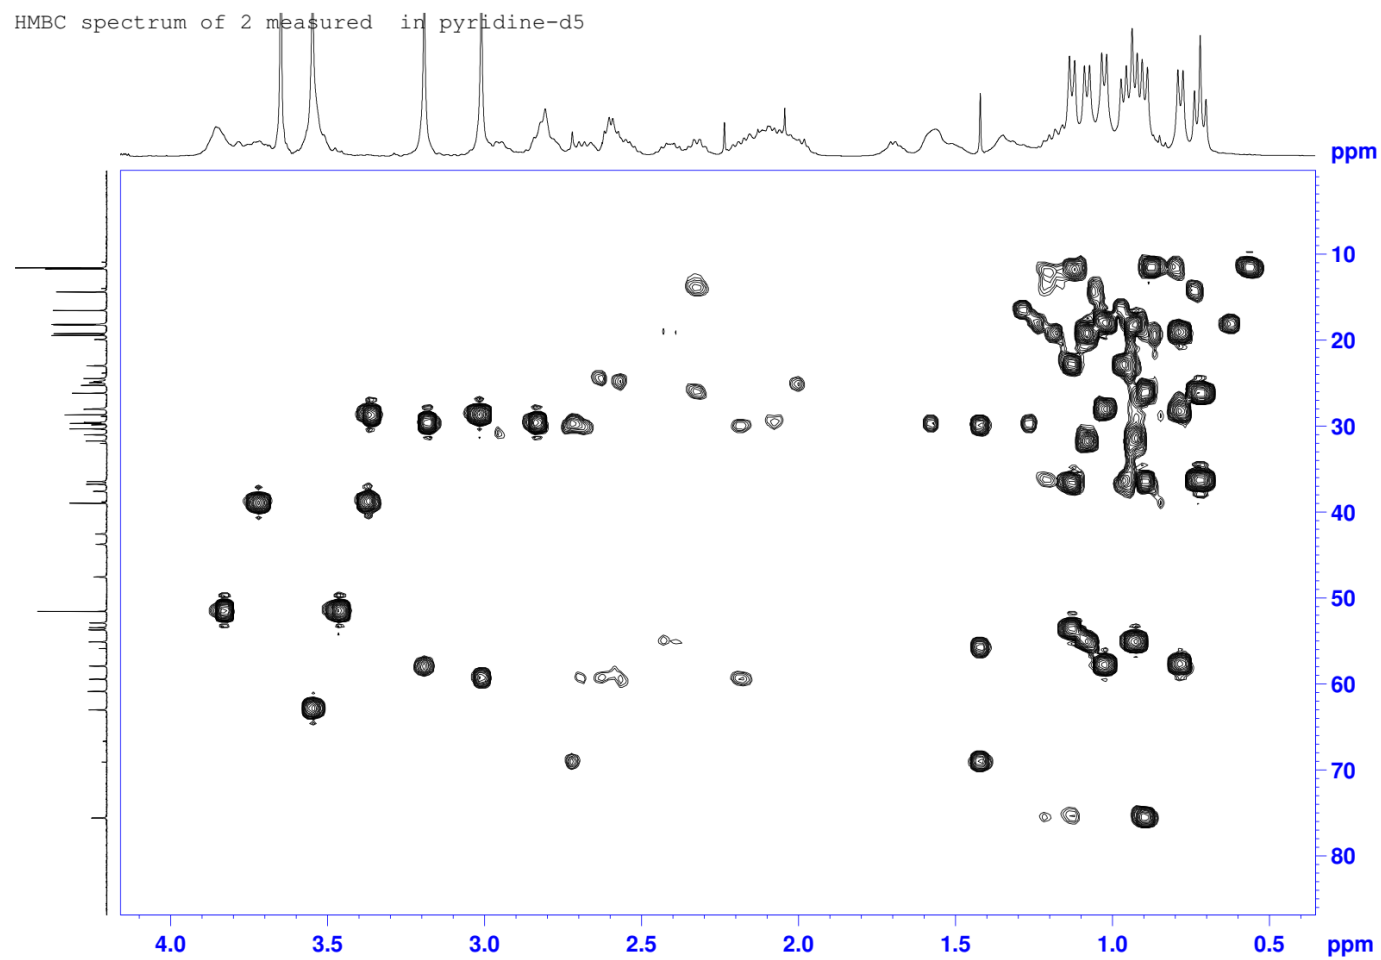

**Figure S29.** Enlarged HMBC spectrum of **2** in pyridine- $d_5$ .

HMBC spectrum of 2 measured in pyridine- $d_5$

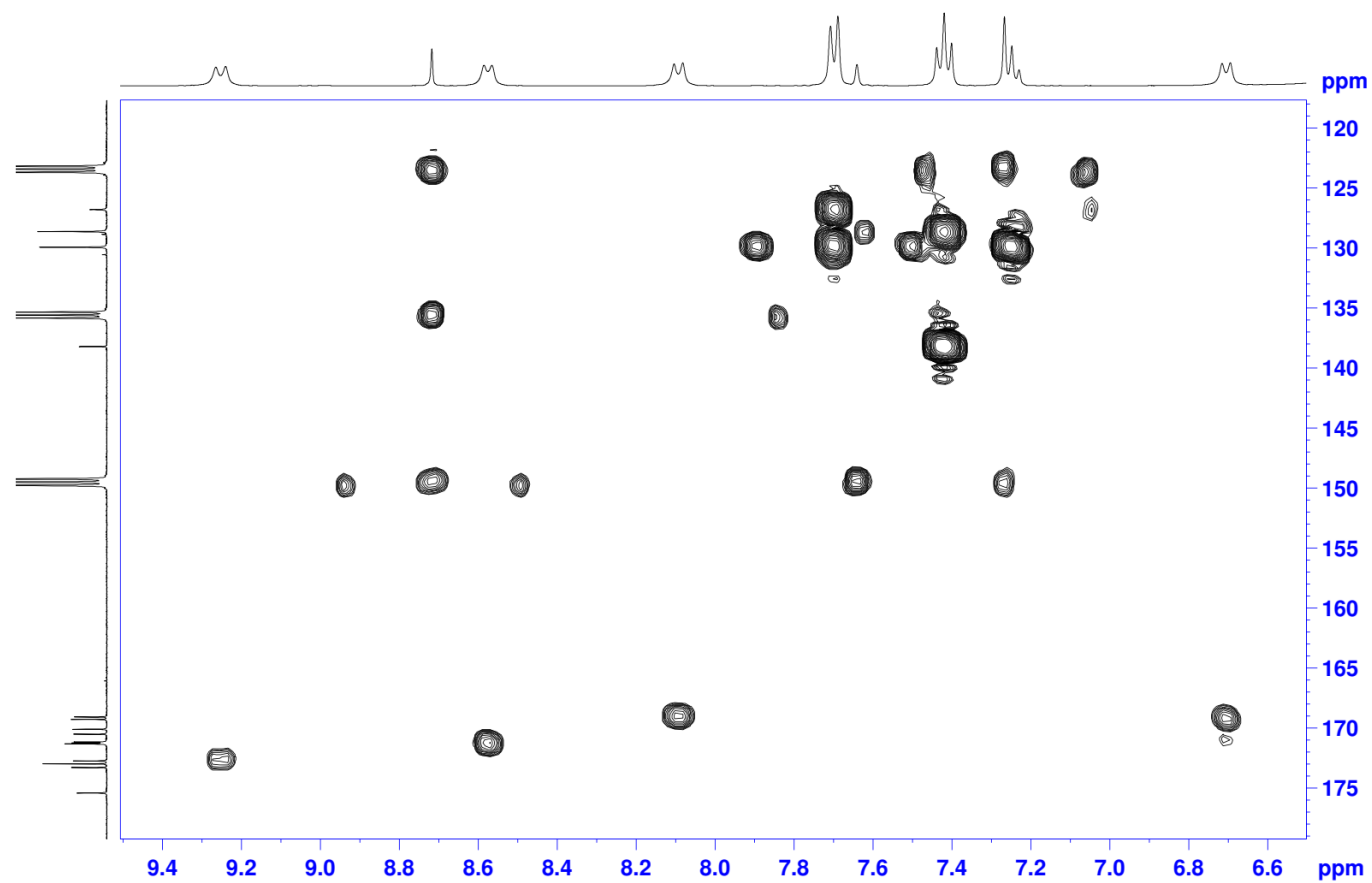

**Figure S30.** Enlarged HMBC spectrum of **2** in pyridine- $d_5$ .

HMBC spectrum of 2 measured in pyridine-d<sub>5</sub>

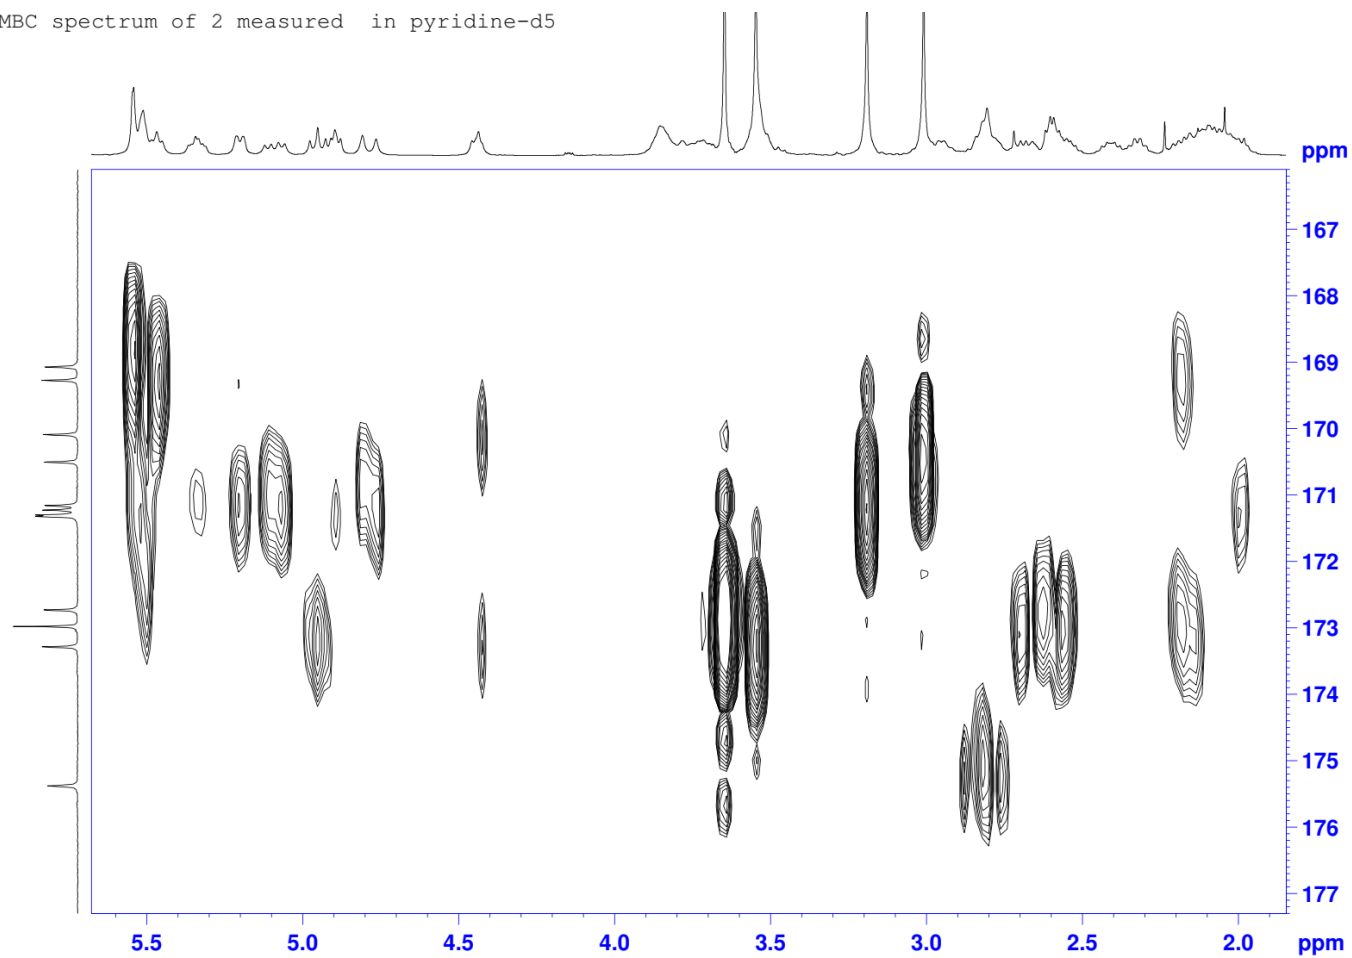

**Figure S31.** Enlarged HMBC spectrum of **2** in pyridine-*d*<sub>5</sub>.

ROESY spectrum of **2** measured in pyridine- $d_5$

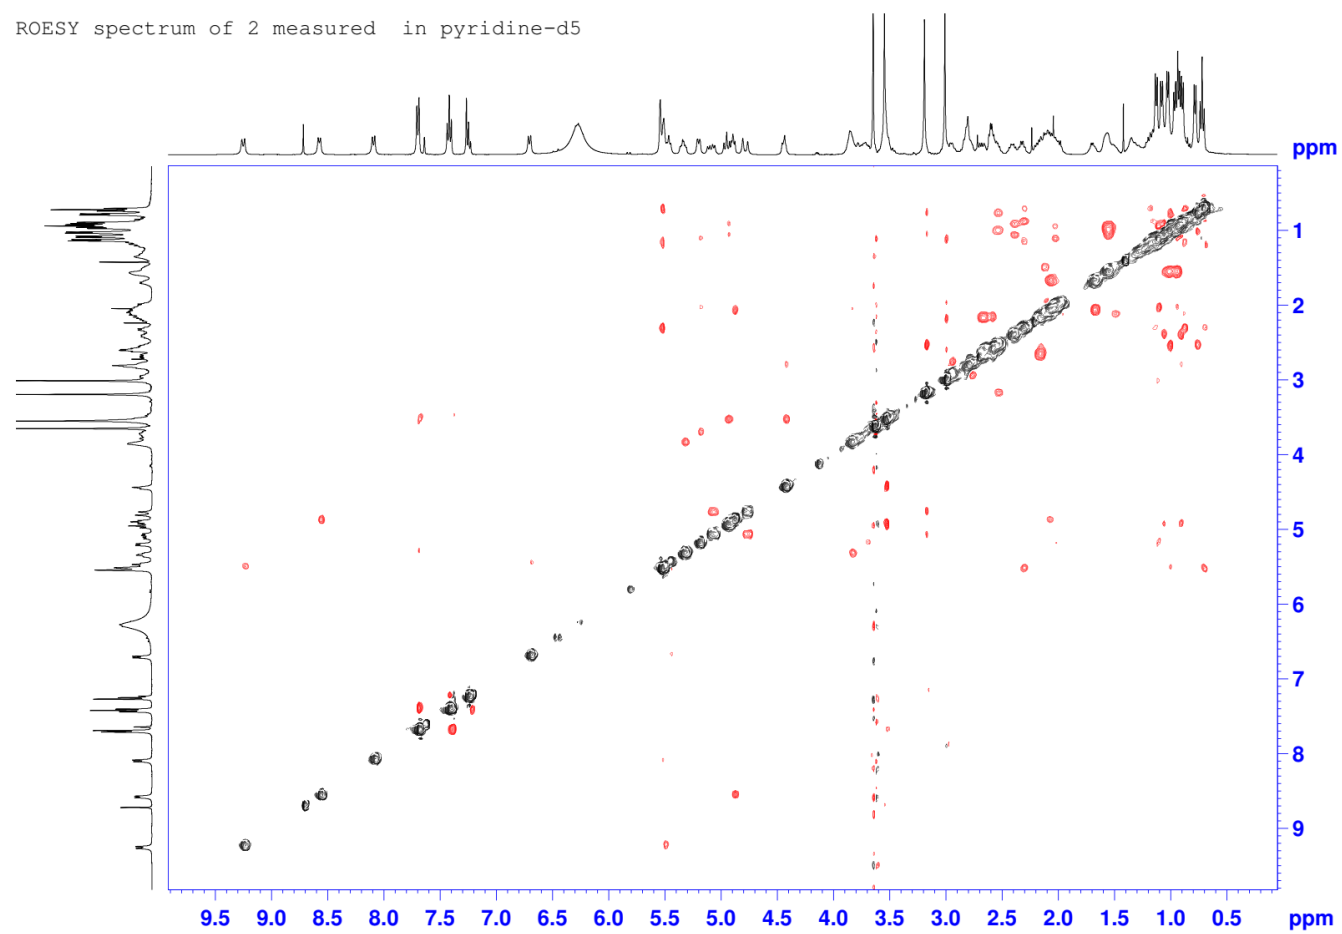

**Figure S32.** ROESY spectrum of **2** in pyridine- $d_5$ .

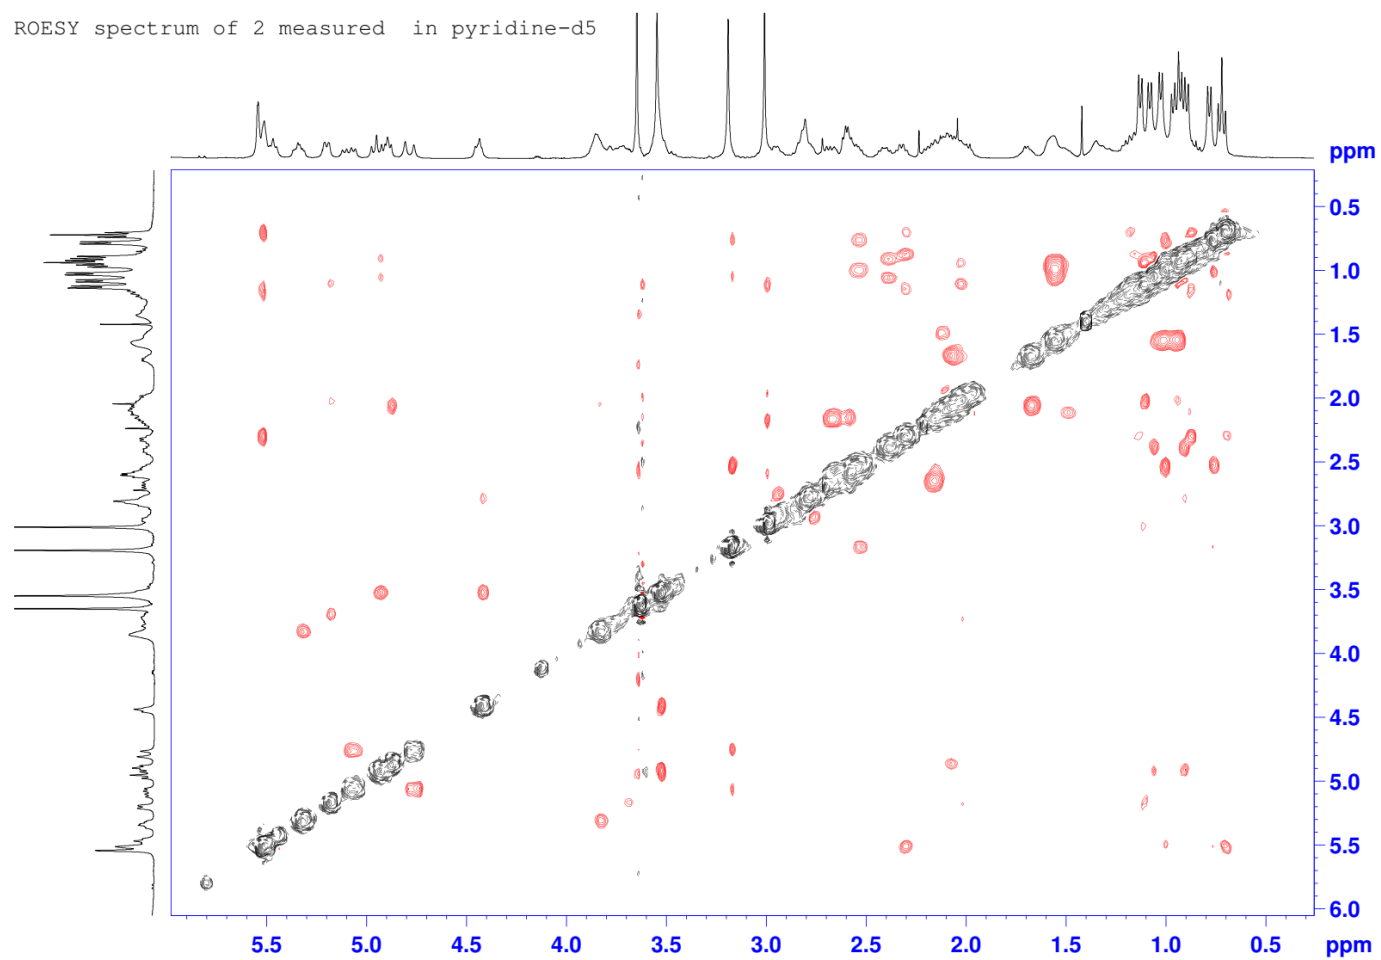

**Figure S33.** Enlarged ROESY spectrum of **2** in pyridine- $d_5$ .

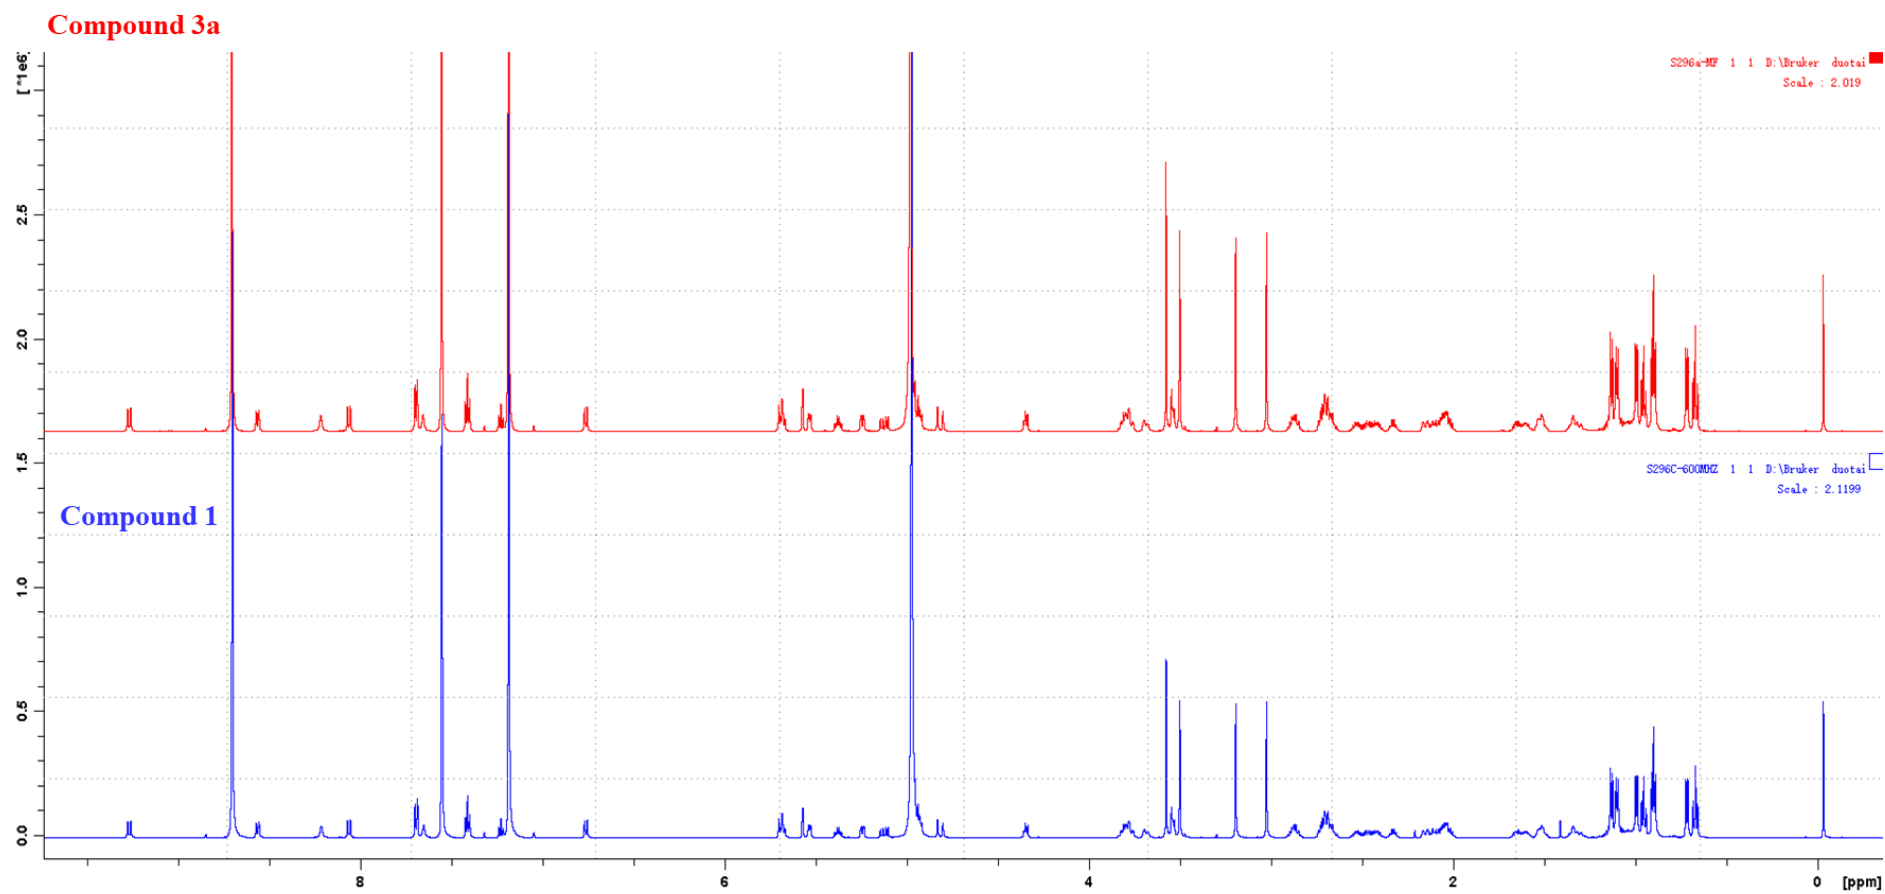

**Figure S34.** Comparison of <sup>1</sup>H NMR spectra of **1** and **3a** in pyridine-*d*<sub>5</sub> at 600 MHz

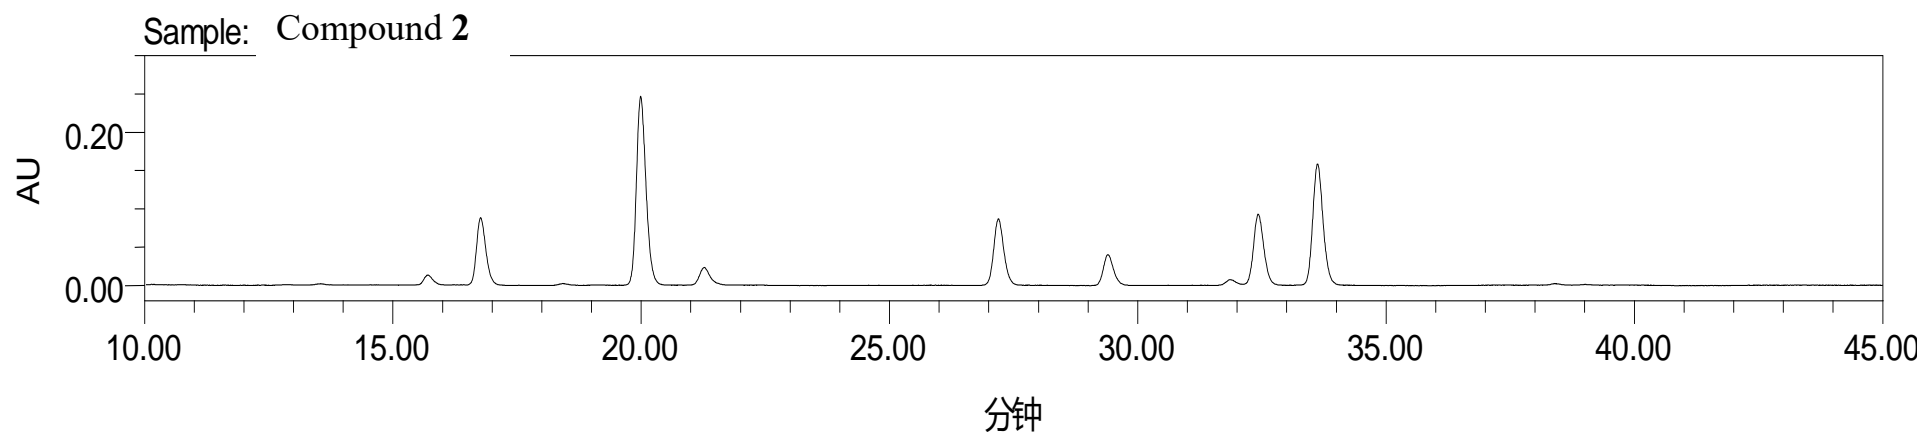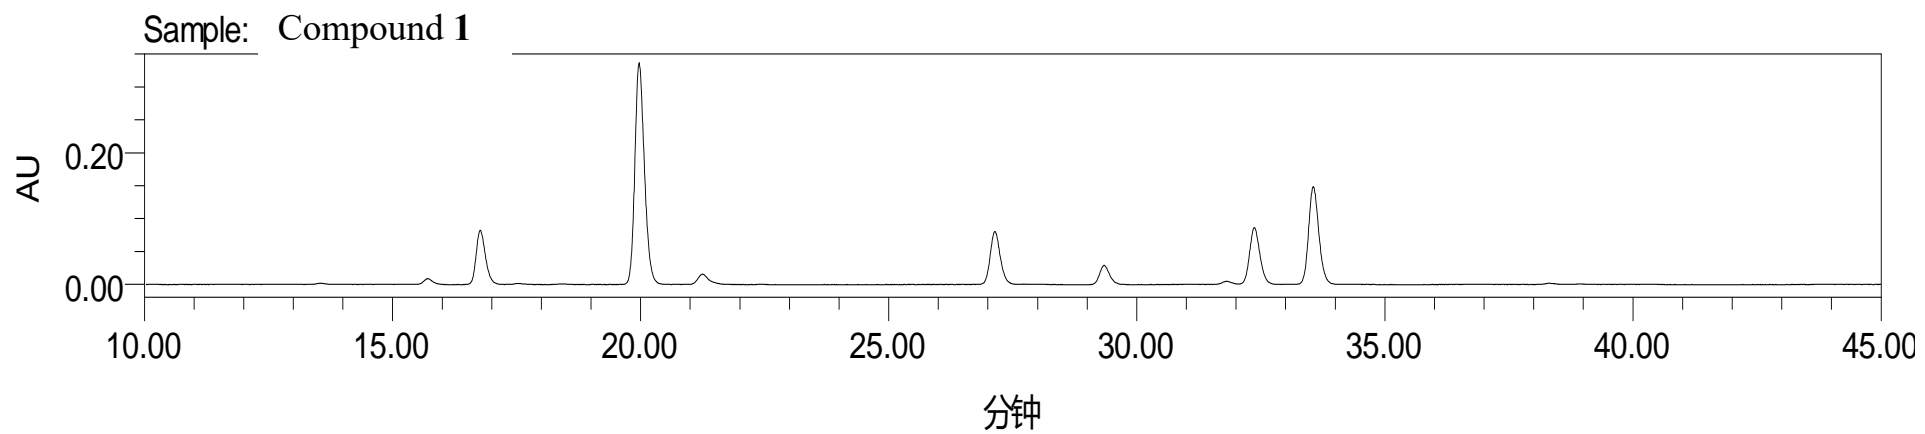

**Figure S35.** HPLC chromatograms of the Marfey's derivatives of **2** and **1**.
